# Supplementary material for: Bone mineral density, rib pain and other features of the female athlete triad in elite lightweight rowers
Source: PubMed Central journal article supplement — BMJ Open. 2014 Feb 12;4(2):e004369. doi: 10.1136/bmjopen-2013-004369 (PMC3927798; doi:10.1136/bmjopen-2013-004369), 2014-02-12
Supplement: bmjopen-2013-004369.draft_revisions.pdf [file bmjopen-2013-004369.draft_revisions.pdf]

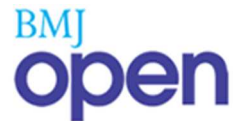

**Bone mineral density, rib pain and other features of the female athlete triad in elite lightweight rowers: new concepts for injury prevention**

|                                 |                                                                                                                                                                                                                                                                                                                                                                                                                                                                  |
|---------------------------------|------------------------------------------------------------------------------------------------------------------------------------------------------------------------------------------------------------------------------------------------------------------------------------------------------------------------------------------------------------------------------------------------------------------------------------------------------------------|
| Journal:                        | <i>BMJ Open</i>                                                                                                                                                                                                                                                                                                                                                                                                                                                  |
| Manuscript ID:                  | bmjopen-2013-004369                                                                                                                                                                                                                                                                                                                                                                                                                                              |
| Article Type:                   | Research                                                                                                                                                                                                                                                                                                                                                                                                                                                         |
| Date Submitted by the Author:   | 30-Oct-2013                                                                                                                                                                                                                                                                                                                                                                                                                                                      |
| Complete List of Authors:       | Dimitriou, Lygeri; Middlesex University, London Sport Institute<br>Weiler, Richard; University College London Hospitals NHS Foundation Trust, Sport and Exercise Medicine<br>Lloyd-Smith, Rebecca; University College London,<br>Turner, Antony; Middlesex University, London Sport Institute<br>Heath, Luke; Middlesex University, London Sport Institute<br>James, Nic; Middlesex University, London Sport Institute<br>Reid, Anna; University College London, |
| <b>Primary Subject Heading</b>: | Sports and exercise medicine                                                                                                                                                                                                                                                                                                                                                                                                                                     |
| Secondary Subject Heading:      | Sports and exercise medicine                                                                                                                                                                                                                                                                                                                                                                                                                                     |
| Keywords:                       | Eating disorders < PSYCHIATRY, Physiology < BASIC SCIENCES, Orthopaedic sports trauma < ORTHOPAEDIC & TRAUMA SURGERY, SPORTS MEDICINE                                                                                                                                                                                                                                                                                                                            |
|                                 |                                                                                                                                                                                                                                                                                                                                                                                                                                                                  |

SCHOLARONE™  
Manuscripts

only

1  
2  
3 **Bone mineral density, rib pain and other features of the female athlete triad in elite**  
4 **lightweight rowers: new concepts for injury prevention**  
5

6  
7 Lygeri Dimitriou<sup>1</sup>, Richard Weiler<sup>2</sup>, Rebecca Lloyd-Smith<sup>3</sup>, Antony Turner<sup>1</sup>, Luke  
8 Heath<sup>1</sup>, Nic James<sup>1</sup>, Anna Reid<sup>3</sup>  
9

10  
11 <sup>1</sup>Middlesex University, London Sport Institute, London, United Kingdom,  
12

13  
14 <sup>2</sup> University College London Hospitals NHS Foundation Trust, London, United  
15  
16 Kingdom  
17

18  
19 <sup>3</sup> University College London, London, United Kingdom  
20

21 **Running Title:** The Triad in elite female lightweight rowers  
22

23 **Word count:** 4145 excluding abstract, and strengths and limitations.  
24

25  
26 Lygeri Dimitriou: [l.dimitriou@mdx.ac.uk](mailto:l.dimitriou@mdx.ac.uk); Richard Weiler: [rweiler@doctors.org.uk](mailto:rweiler@doctors.org.uk);  
27

28  
29 Rebecca Lloyd-Smith: [rlloydSmith@hotmail.com](mailto:rlloydSmith@hotmail.com); Antony Turner:  
30

31 [A.N.Turner@mdx.ac.uk](mailto:A.N.Turner@mdx.ac.uk); Luke Heath: [heath.luke@hotmail.co.uk](mailto:heath.luke@hotmail.co.uk); Nic James:  
32

33 [n.james@mdx.ac.uk](mailto:n.james@mdx.ac.uk); Anna Reid: [anna\\_reid@yahoo.com](mailto:anna_reid@yahoo.com);  
34

35  
36 Address for correspondence: Lygeri Dimitriou, Middlesex University, London Sport  
37

38 Institute, The Burroughs, Hendon, London NW4 4BT, United Kingdom, Tel: +44(0)20  
39

40 8411 4354, Fax: +44(0)20 8411 4354, email: [l.dimitriou@mdx.ac.uk](mailto:l.dimitriou@mdx.ac.uk)  
41

42 **Key words:** DXA, menstrual dysfunction, exercise, dieting, skeletal health,  
43

44 **fractures**  
45  
46  
47  
48  
49  
50  
51  
52  
53  
54  
55  
56  
57  
58  
59  
60

## The Triad in elite female lightweight rowers

### ABSTRACT

**Objective:** To determine bone mineral density (BMD) and the associations among BMD, menstrual history, disordered eating (DE), training history, intentional weight loss and rib pain for the first time in female lightweight rowers.

**Methods:** Dual-energy X-ray absorptiometry measured total body (TB) composition and BMD at the spine, femoral neck (FN), radius and TB. Questionnaires (EAT-26) measured DE, oligo/amenorrhea years, rib pain, training history and nutritional support provision in 21 elite female lightweight rowers (12 active, 9 retired).

**Results:** DE was reported in 6 of the rowers. The active with DE started rowing younger ( $P<0.05$ ) than those without, and their amount of intentional weight loss (IWL) was associated with EAT-26 score ( $P<0.05$ ). Some participants reported a history of oligo/amenorrhea 17 (76%) and/or rib pain 7 (32%) with those with rib pain having lower spine and TB Z-scores ( $P<0.05$ ) than those without. Those with oligo/amenorrhea had lower spine Z-scores ( $P<0.01$ ) than those without. Twelve participants had low BMD; three at spine; one at FN; and eight at radius. 13% of mean total training hours ( $18.6 \pm 9.1 \text{ h} \cdot \text{week}^{-1}$ ) were spent strength training ( $2.4 \pm 2.2 \text{ h} \cdot \text{week}^{-1}$ ). **Conclusions:** Upper-body exercises incorporating multidimensional high peak bone strain were not reported and may need to be considered in their strength training to improve radial BMD. Results suggest IWL and high-level training at a young age increases the likelihood of DE and there may be a lack of quality nutritional support for these athletes.

### Strengths and limitations of this study

- The first multidisciplinary study to investigate the distribution of BMD, compared to parameters established in healthy non-athletic women, in association to rib stress fractures in UK elite active and retired female lightweight rowers.
- The first study to suggest that lightweight rowing rules may be partly responsible for the development of the Triad, and perhaps changing the weight rules to discourage unhealthy weight loss practices could prevent injury.
- The first study that contrasts with the sport-specificity theorem and highlights the importance of supplemental non-sport specific exercises in the training programmes of rowers and other athletes, that particularly suffer from low radius BMD, to elicit bone health and possibly reduce the incidence of skeletal fractures later in life.
- Generalisations for elite female lightweight rowers are limited by the small sample size.
- The validity of self-reported questionnaires has been critiqued on the credibility of honest responses.

## Introduction

Rowing is an Olympic sport with two weight categories: open (no weight restriction) and lightweight. To qualify for racing lightweight, female rowers must weigh-in at no more than 59kg with a crew average of no more than 57kg (International Rowing Federation). The majority of lightweight rowers restrict their diet to meet weight restrictions using both acute and chronic methods of weight-loss [1, 2]. This could lead to disordered eating (DE), chronic energy deficiency, and subsequently menstrual dysfunction and low bone mineral density (BMD) [3, 4, 5]. The latter two are associated with bone stress injuries [6] and endothelial dysfunction, a concern for future cardiovascular risk [7]. The Female Athlete Triad (the Triad) according to the American College of Sports Medicine (ACSM) revised position statement; is an association between energy availability, menstrual function, and BMD, which may have clinical manifestations including eating disorders, amenorrhea, and osteoporosis [5]. Low energy availability, with or without disordered eating, can cause amenorrhea and reduced BMD due to reductions in leptin [8], insulin like growth factor (IGF-1) [9], and oestrogen production [10]. It has been reported that when severely restricted energy availability is prolonged, from either dietary restriction or increased expenditure, irreversible reductions in BMD could result [11]. Even less severe energy restrictions could suppress bone formation, and possibly prevent young women from achieving their genetic potential for peak BMD [11].

The Triad is also associated with increased incidence of musculoskeletal injuries and higher stress fracture risk [12] and is prevalent in sports where leanness is considered important [5]. The existence of the Triad is documented in dancers [13, 14], triathletes [15], distance runners [16, 17] and swimmers [18] but not in female lightweight rowers,

1  
2  
3 who commonly have a higher risk for rib stress fractures [19], and where leanness and  
4  
5 weight control determine eligibility to compete and participate in the sport.  
6  
7

8  
9  
10 Disordered eating may describe the array of abnormal and harmful sub-clinical eating  
11  
12 attitudes used to lose weight or maintain low weight, and is thought to affect up to two-  
13  
14 thirds of young female athletes [20]. Sundgot-Borgen and Torstveit's, [21] more recent  
15  
16 and large study on 572 elite female athletes showed a 20% prevalence of eating  
17  
18 disorders, indicating a significant clinical issue for the health of a great amount of  
19  
20 athletes. Eating disorders have one of the highest mortality rates of mental illnesses [22],  
21  
22 and have been reported to be more prevalent (31%) in elite female athletes involved in  
23  
24 sports emphasising leanness compared to those athletes (8%) involved in sports with  
25  
26 less emphasis on leanness [23]. Studies on rowing have shown that lightweights are at a  
27  
28 higher eating disorder risk than heavyweights, as identified by the Eating Attitudes Test-  
29  
30 26 (EAT-26), [24, 25]. This is in accord with the higher prevalence of DE in "weight-  
31  
32 category" sports which was reported by Sundgot-Borgen's, [26] study on 522 elite  
33  
34 female athletes from 35 sports and 448 nonathletic controls. An incidence of 12% [24]  
35  
36 and 16.2% [25] of DE has been reported in lightweight rowers in the past. The  
37  
38 interlinked nature between DE, menstrual dysfunction and BMD is demonstrated in  
39  
40 studies that established a relationship between DE and menstrual dysfunction [4, 16],  
41  
42 between menstrual dysfunction and low BMD [3, 27] and between DE and low BMD in  
43  
44 the absence of menstrual dysfunction [4, 16, 27]. Low BMD is also linked with  
45  
46 increased incidence of stress fractures in male and female Marine recruits [28] and with  
47  
48 exercise-induced rib stress fractures in male lightweight rowers [29]. Although one of  
49  
50 the most common injuries in female rowers is rib stress fractures, its aetiology remains  
51  
52  
53  
54  
55  
56  
57  
58  
59  
60

1  
2  
3 unclear [19]. Rib stress fractures are less common in men [30], suggesting that low  
4  
5 oestrogen levels, low BMD or factors associated with the Triad might be causative for  
6  
7 rib stress fractures in female rowers.  
8  
9

10  
11  
12 To date, no studies have investigated BMD in relation to rib stress fractures in female  
13  
14 lightweight rowers. This reinforces the view of [31], that the pathology and prevention  
15  
16 of rib stress fractures is a worthy area of research in rowing. Little is known about the  
17  
18 possible long-term implications of the Triad but it appears that the effects on BMD  
19  
20 might be partially irreversible [13, 32, 33].  
21  
22  
23

24  
25  
26 The aims of the present study were therefore to investigate: 1) The distribution of BMD  
27  
28 for the first time in UK elite active and retired female lightweight rowers compared to  
29  
30 the parameters established in healthy non-athletic women; 2) the associations among  
31  
32 BMD, menstrual history, training history, DE, intentional weight loss and rib pain and  
33  
34 3) assess whether any past DE symptoms and menstrual dysfunction continue after  
35  
36 retirement.  
37  
38  
39  
40  
41

## 42 **Methods**

### 43 **Ethics**

44  
45  
46 This study was approved by the Health Studies Ethics Committee at Middlesex  
47  
48 University. This research received no specific grant from any funding agency in the  
49  
50 public, commercial or not-for-profit sectors. Details of the study's methods and testing  
51  
52 procedures were explained to each participant, before a written, informed consent was  
53  
54 obtained.  
55  
56  
57  
58  
59  
60

## Participants

Participants were recruited from responses to recruitment advertisements in rowing clubs and a rowing magazine. No mention of DE, menstrual disorders and other aspects of the Triad were included in the advert to avoid possible sample selection bias. The year of this study only 79 UK female lightweight rowers were identified to participate in national and international level competitions. Twenty-nine Caucasian female lightweight rowers, from 9 different clubs volunteered to participate in this study. Only 21 (12 active, 9 retired) met the study's criteria and volunteered for the study. Inclusion criteria were females aged over 18 years who had rowed competitively in lightweight category for no less than one year. Participants were excluded if they had a history of bone disease, used medications known to influence BMD (e.g., corticosteroids, antidepressants, thiazolidinediones, bisphosphonates, NSAIDs and chemotherapy) or if they were pregnant, lactating or post-menopausal. Two rowers were excluded and six withdraw for logistic reasons. Rowing competition level was: 5 international (2 active) and 16 national (10 active) level. All were non-smokers and their mean weekly alcohol consumption was  $5.8 \pm 1.2$  units per week. None reported vitamin D and calcium supplements intake and all but two did not regularly (3-4/week) eat products containing calcium.

## Questionnaires:

### **EAT-26 and Pathogenic Weight Control Strategies**

Symptoms and characteristics of eating disorders were assessed by the EAT-26, a 26-item inventory with strong psychometric properties [34]. Thirteen items relate to "dieting" behaviour, six to "Bulimia and Food Preoccupation" and seven to "Oral



1  
2  
3 Control". The 26 items of the EAT-26 inventory were rated on a 6-point response scale  
4  
5 as described in Garner et al. [34]. The score can range from 0-78. A score of 20 or above  
6  
7 is considered indicative of DE [34].  
8

9  
10 Self-reported questionnaires assessed whether participants had been engaged in any  
11  
12 pathogenic weight control strategies such as vomiting and/or use of laxatives to induce  
13  
14 weight loss within the last 6 months. Present or past engagement in binge-eating  
15  
16 behaviour, eating more than other people would in the same situation [35] and whether  
17  
18 they had previously been diagnosed with an eating disorder were also assessed. Retired  
19  
20 rowers were assessed to observe whether any past pathogenic weight control strategies  
21  
22 continued after retirement.  
23  
24  
25  
26  
27

### 28 **Menstrual History Questionnaire**

29  
30 All rowers reported their age of menarche and number of menses for each year after  
31  
32 menarche choosing from the following options: amenorrhea (0-3), oligomenorrhea (4-9)  
33  
34 and eumenorrhea (10-13) [16]. Total lifetime menses (years) and number of years of  
35  
36 amenorrhea, and oligomenorrhea was calculated as described in Cobb et al. [16] and  
37  
38 normalised for age by dividing the number of years of each of the above menstrual  
39  
40 variables with current age. Due to the small sample size, menstrual history status was  
41  
42 categorised into two groups of oligo/amenorrheic (those with history of  
43  
44 oligo/amenorrhea) and eumenorrheic (those without). Retired rowers were assessed to  
45  
46 observe whether any history of oligo/amenorrhea continued after retirement.  
47  
48  
49  
50  
51  
52  
53  
54

### 55 **Additional Questionnaires**

56  
57  
58  
59  
60

1  
2  
3 Self-reported questionnaires assessed demographic data, including details of sporting  
4  
5 history, mode of training including type of resistance training exercises and average  
6  
7 weekly training volume (hours) at highest competitive level for both retired and active  
8  
9 rowers, level of competition, medical history, use of medications, supplements and oral  
10  
11 contraceptives (OCA), smoking, alcohol intake and weight loss. Duration of OCA use  
12  
13 was normalised for gynecological age by dividing the number of years of OCA use with  
14  
15 gynecological age. History of injury was reported by drawing the area of symptoms on a  
16  
17 body chart and answering questions about cause of injury, duration of symptoms, and  
18  
19 diagnosis. History, duration and cause of rib pain were also recorded. Participants were  
20  
21 also asked whether they had ever been provided with nutritional and/or weight  
22  
23 management advice from coach/club. Retired rowers gave details of physical activity  
24  
25 since retiring from lightweight rowing. Questionnaire details were verbally explained to  
26  
27 each participant in conjunction with written instructions. Whilst participants were  
28  
29 completing the questionnaires investigators were present to clarify any issues/questions  
30  
31 and tried to ensure that the answers were as accurate as possible.  
32  
33  
34  
35  
36  
37  
38  
39

#### 40 **Physical and Bone Measurements**

41  
42 Bone mineral density ( $\text{g}\cdot\text{cm}^{-2}$ ) at the posterior anterior (PA) L2-4 lumbar spine (LS); PA  
43  
44 femoral neck (FN); dominant arm distal radius; total body and body composition (lean  
45  
46 and fat mass) were measured by DXA (fan beam, Lunar DPX-L series GE Medical  
47  
48 systems, Lunar Madison, WI USA). The in-house coefficient of variation of the BMD  
49  
50 measurements ranged from 0.5-0-1.4%. The scanner was calibrated using a spine  
51  
52 phantom at the start of each day of testing and its performance was followed with the  
53  
54 labs quality assurance protocol. Z-scores were calculated using the manufacturer-  
55  
56  
57  
58  
59  
60

1  
2  
3 supplied reference data (Lunar enCORE© USA/European reference data) set to compare  
4  
5 individuals BMD values to age and sex-matched controls. The ACSM defines the term  
6  
7 'low BMD' as a Z-score between -1 and -2, and 'osteoporosis' a Z-score  $\leq -2$  together  
8  
9 with secondary risk factors for fracture (e.g., chronic malnutrition, eating disorders,  
10  
11 hypoestrogenism, hypogonadism, glucocorticoid exposure, and previous fractures,[3]).  
12  
13

14  
15  
16  
17 All participants were requested to refrain from heavy physical activity 24 h before  
18  
19 screening to minimize the effect of fluctuations in hydration status on body composition  
20  
21 measurements. Participants' height (m) and body mass (kg) were measured using  
22  
23 standard stadiometers and balance beam scales, respectively. Body mass index (BMI)  
24  
25 was calculated as kilograms per square meter ( $\text{kg}\cdot\text{m}^{-2}$ ). All anthropometric  
26  
27 measurements, scanning and analyses were performed by the same technician using the  
28  
29 same equipment.  
30  
31  
32  
33  
34  
35  
36  
37

### 38 **Statistical Analyses**

39  
40 Statistical analyses were performed using SPSS version 16.0. Values are reported as  
41  
42 means  $\pm$  SD. Statistical significance was set at  $P < 0.05$ . Levene's test was used to assess  
43  
44 equality of variances in the different groups. Violations of the equality of variances  
45  
46 assumption were corrected using the P-value calculated for equal variances not assumed.  
47  
48 A General Linear Model was used to determine whether Z-scores, years of training, age  
49  
50 of menarche, and amount of intentional weight loss differ: 1) between rowers with and  
51  
52 without history of oligo/amenorrhea or rib pain, and 2) between active rowers that  
53  
54 scored  $\geq 20$  and active rowers that scored  $< 20$  on the EAT-26. When the Z-scores were  
55  
56  
57  
58  
59  
60

1  
2 analysed to assess for differences between participants, data was adjusted/controlled for  
3  
4 BMI [36], by fitting an ANCOVA to the data.  
5  
6  
7  
8

9  
10 Z-scores were used in the statistical analyses, as they are normative values for  
11  
12 chronological age. Pearson's correlation coefficient was used to determine significant  
13  
14 relationships between variables of interest. Any analysis performed between Z-scores  
15  
16 and other specific variables was controlled for BMI. Correlation analysis between EAT-  
17  
18 26 score and amount of intentional weight loss and duration of OCA use was applied  
19  
20 only in the data of active rowers. The retired were excluded because their weight loss  
21  
22 data refers to the past whilst the EAT-26 data refers to their current DE attitudes.  
23  
24  
25  
26  
27

## 28 **Results**

29  
30  
31  
32 The anthropometric characteristics, training and menstrual history details and OCA use  
33  
34 of the lightweight rowers is summarized in Table 1.  
35  
36  
37

38 *Table 1.* Anthropometric characteristics, training and menstrual history details and oral  
39  
40 contraceptive use of lightweight rowers  
41  
42  
43  
44  
45  
46  
47  
48  
49  
50  
51  
52  
53  
54  
55  
56  
57  
58  
59  
60

| Variable                                                                         | Active<br>N =12 | Retired<br>N=9 | Both<br>N=21            |
|----------------------------------------------------------------------------------|-----------------|----------------|-------------------------|
| Age (yr)                                                                         | 26.6 ±2.0       | 31.6 ±5.0      | 28.7 ±4.3 (23-39)*      |
| Stature (cm)                                                                     | 171.8 ±5.5      | 165.7±2.8      | 169.2±5.4 (162.0-179.5) |
| Body mass (kg)                                                                   | 61.2±1.8        | 61.5±5.4       | 61.3 ±3.7 (56.8-73)     |
| Body fat (%)                                                                     | 21.4±5.8        | 23.1±7.2       | 22.1 ±6.4 (11.6-35.1)   |
| BMI (kg.m <sup>-2</sup> )                                                        | 20.8±1.1        | 22.3 ±2.6      | 21.4±2.0 (19.5-27.8)    |
| Age at onset of exercising (yr)                                                  | 15.1±5.7        | 11.3 ±4.6      | 13.5 ±5.6 (4-26)        |
| Years playing sports                                                             | 11.5±5.2        | 20.2 ±5.0      | 15.2 ±6.7 (2-31)*       |
| Years training at lightweight category                                           | 2.5 ±1.1        | 6.0 ±3.8       | 4.0 ±3.1 (1-12)*        |
| Training per week (h)                                                            | 15.3 ±4.1       | 22.9 ±12       | 18.6 ±9.0 (10-53)       |
| Strength and power training per week (h)                                         | 1.7 ±1.6        | 3.3 ±2.6       | 2.4 ±2.2 (0-10)         |
| Water rower training per week (h)                                                | 8.8 ±2.8        | 11.1 ±2.7      | 9.8 ±3.0 (5-16)         |
| Cardiovascular training (i.e., cycling, running, ergometer rowing ) per week (h) | 4.8 ±2.2        | 8.6 ±9.8       | 6.4 ±6.7 (1-33.5)       |
| Age at onset of retirement (yr)                                                  | NA              | 28.6±5.6       | NA                      |
| Years since retirement                                                           | NA              | 3.0 ±1.9       | NA                      |
| OCA (yr)                                                                         | 4.3±3.1         | 2.4±1.4        | 3.9 ±2.7 (1-9)          |
| Years with oligo/amenorrhea                                                      | 4.5 ±3.9        | 4.2 ±4.4       | 4.4±4.0 (0-13)          |
| Menarcheal age (yr)                                                              | 13.4 ±1.1       | 13.0 ±1.2      | 13.2±1.1 (11-15)        |
| Oligo/amenorrhic (N)                                                             | 10              | 7              | 17                      |
| Gynaecological age (yr)                                                          | 13.2±2.2        | 18.5±5.1       | 15.5±4.5 (10-27)*       |
| Total lifetime menses (yr)                                                       | 10.8±2.3        | 14.6±5.4       | 12.4±4.3 (4.9-25.3)     |

1  
2 Values are mean  $\pm$  SD. \* $P < 0.05$  between active and retired rowers. Gynecological age is  
3 years since menarche; OCA is length of oral contraceptive use in years; all  
4  
5  
6  
7 oligo/amenorrhea years were secondary (occurred after menarche).  
8  
9

### 10 11 **Bone Mineral Density**

12  
13 Three participants had low BMD at LS (Z-scores -1.5, -1.2 and -1.1), one at FN (Z-score  
14 -1.1) and eight at radius. Three of these had Z-scores below -2 at radius (Z-scores -2.3, -  
15  
16  
17 2.1 and -2.3). As depicted in Figure 1, the mean Z-scores of the oligo/amenorrheic,  
18  
19 active and retired rowers was significantly lower at LS (AD=1.75,  $F(2,21) = 11.455$ ,  $P$   
20  $< 0.01$ ,  $\eta^2 = 0.560$ ) compared to the eumenorrheic rowers. Total lifetime menses  
21  
22 (controlled for BMI values) was positively associated with Z-scores at LS ( $r = 0.516$ ,  
23  
24  $P < 0.05$ ) and at FN ( $r = 0.438$ ,  $P < 0.05$ ).  
25  
26  
27  
28  
29  
30  
31  
32

33 Furthermore, when the retired were looked at separately, the results revealed that the  
34  
35 oligo/amenorrheic rowers had significantly lower Z-scores at LS (AD=2.7,  $F(2,9) =$   
36  
37 17.307,  $P < 0.01$ ,  $\eta^2 = 0.852$ ) and total body (AD=1.47,  $F(2,9) = 26.756$ ,  $P < 0.01$ ,  
38  
39  $\eta^2 = 0.899$ ) compared to the eumenorrheic retired rowers. Mean Z-scores of  
40  
41 eumenorrheic retired were above normal at all sites.  
42  
43  
44  
45  
46  
47

### 48 **Disordered Eating, Pathogenic Weight Control Strategies**

49 All active rowers reported engagement in intentional weight loss to qualify for  
50  
51 lightweight racing. Both active and retired rowers reported DE attitudes (EAT-26 score  
52  
53  $> 20$ ) and pathogenic weight control strategies (Table 2).  
54  
55  
56  
57  
58  
59  
60

Independent sample T-tests showed that active rowers with DE symptoms, had started rowing at a significantly younger age ( $10.6 \pm 3.1$ yr) than those without DE ( $18.3 \pm 4.9$ yr), ( $t=-3.088$ ,  $P<0.05$ ). The EAT-26 score was associated with the amount of intentional weight loss ( $r=0.720$ ,  $P<0.05$ ), see Figure 2, and duration of OCA use ( $r=0.908$ ,  $P<0.001$ ).

Table 2. Reported eating attitudes in lightweight rowers

|                                                | Active<br>N =12             | Retired<br>N=9              | Overall<br>N=21            |
|------------------------------------------------|-----------------------------|-----------------------------|----------------------------|
| DE symptoms N (%)                              | 5 42                        | 1 11                        | 6 29                       |
| Binge eating episodes N (%)                    | 8 67                        | 0                           | 8 38                       |
| Induced vomiting N (%)                         | 3 25                        | 0                           | 3 14                       |
| Use of laxatives N (%)                         | 4 33                        | 2 22 $\neq$                 | 6 29                       |
| Intentional weight loss N<br>(%)(Mean loss SD) | 12 100<br>(5.8 $\pm$ 1.9kg) | 8 89<br>(6.3 $\pm$ 4.5kg) † | 20 95<br>(6.0 $\pm$ 3.2kg) |

$\neq$ past laxative use during their rowing career

†past intentional weight loss to qualify for racing lightweight during their rowing career

### Rib Pain

Seven participants (32%) reported a history of rib pain lasting between 2 to 10 weeks.

As depicted in Figure 3, the Z-scores at total body and LS were significantly lower

( $P<0.05$ ) in rowers with history of rib pain compared to those without. Additionally,

rowers with rib pain reported to train more hours per week, (21 vs. 17h,  $P>0.05$ ), and to

have higher oligo/amenorrhea years (8.8 vs. 4yr,  $P>0.05$ ) than those without.

There is no additional data available.

## Discussion

This study confirms the co-existence of reduced BMD, oligo/amenorrhea, disordered eating and intentional weight loss, in UK elite female lightweight rowers. The association between total lifetime menses and BMD supports the notion that BMD declines as the number of missed menstrual cycles accumulates [32].

A novel, but concerning finding in this study was that total EAT-26 score was associated with the amount of intentional weight loss in active rowers which suggests that intentional weight loss increases the likelihood of engaging in DE behaviours.

Furthermore, active rowers with DE symptoms, had started rowing at a significantly younger age ( $10.6 \pm 3.1$  yr) than those without DE ( $18.3 \pm 4.9$  yr), which suggests involvement in high level training at a young and vulnerable age (all rowers achieved national and international level) is significantly associated with risk to DE attitudes [37].

A meta-analysis of 34 studies (2459 athletes) supports these findings, which showed an increased risk of DE in elite athletes compared to non-elite [38]. Additionally, a higher prevalence of eating disorders among adolescent elite athletes than controls has been reported in a most recent study by Martinsen and Sundgot-Borgen, [39]. Binge eating was also a common finding among the active rowers (67%), which compares to 52% encountered by Thiel et al. [40]. Pathogenic weight control strategies and symptoms of DE and binge eating were more prevalent in the active than the retired rowers of this study, and in earlier studies on elite rowers [24, 25].

Furthermore, only 2/12 (17%) active compared to 4/9 (44%) retired reported to have received professional nutritional support for rowing and weight management. The



1  
2 importance of nutritional guidance to help in the prevention and treatment of DE has  
3  
4 been evident to this study and is in agreement with Beals and Manore, [41] who stated  
5  
6 that one of the issues that leads athletes to fail to meet their exercise energy  
7  
8 requirements is lack of appropriate nutritional knowledge. Sundgot-Burgen and  
9  
10 Klungland,[42], reported that the prevalence of DE was reduced from 33% to 15% in  
11  
12 cross-country skiers over an 8-year DE preventative programme. Therefore, quality  
13  
14 nutritional guidance should be offered from a young age to possibly minimize DE and  
15  
16 the health related risks [4, 16, 43]. Youth rowing coach education on DE and Triad risk  
17  
18 or perhaps even weight category rule change consideration may also needed to prevent  
19  
20 DE, the Triad and associated unhealthy conditions in developing lightweight female  
21  
22 rowers.  
23  
24  
25  
26  
27  
28  
29  
30

31 Weight loss is predominantly the result of negative energy balance, however, methods  
32  
33 of intentional weight loss such as the use of laxatives, which was reported in this study,  
34  
35 or other dehydration methods do not necessarily mean low energy availability [44] or a  
36  
37 symptom of DE. In this study no association was found between symptoms of DE and  
38  
39 BMD, which is contrary to previous studies [4, 16]. However, DE is not necessarily a  
40  
41 component of the Triad whereas low energy availability is [5]. Assessment of DE is also  
42  
43 an important medical consideration, and can help identify psychopathological  
44  
45 individuals with the Triad, in addition to indirectly establishing the possibility of low  
46  
47 energy availability.  
48  
49  
50  
51  
52  
53  
54

55 Prevalence of DE in lightweight rowers, as assessed by a score  $\geq 20$  on the EAT-26  
56  
57 questionnaire, has been reported to be between 12 and 16% [24, 25] compared to 29% in  
58  
59  
60

1  
2  
3  
4  
5  
6  
7  
8  
9  
10  
11  
12  
13  
14  
15  
16  
17  
18  
19  
20  
21  
22  
23  
24  
25  
26  
27  
28  
29  
30  
31  
32  
33  
34  
35  
36  
37  
38  
39  
40  
41  
42  
43  
44  
45  
46  
47  
48  
49  
50  
51  
52  
53  
54  
55  
56  
57  
58  
59  
60

this study. These results suggest that the rowers from the above research studies and the present study are considered “at risk” for clinical eating disorders [45]. This percentage could have been even higher as athletes tend to under report symptoms of DE [20, 26] due to denial and secrecy which are hallmarks of DE [22], and because do not consider eating habits as DE, but as “part of the game” in season. Denying DE symptoms has clinical implications for these athletes including delayed facilitation of appropriate therapy.

In ballet dancers and runners, the reproductive hormonal changes caused by excessive exercise and low energy availability may result in low BMD at LS [16, 46]. The mechanical stresses of rowing appear to exert protection on the lumbar BMD [47]. The eumenorrhic rowers in this study demonstrated elevated BMD measurements compared to their age and sex-matched reference data, particularly at LS, which is in accord with Wolman et al. [48]. However, the mean lumbar BMD of the oligo/amenorrhic rowers in this study was not elevated compared to their age and sex-matched reference data, suggesting that oligo/amenorrhea has a negative effect on BMD [32]. This can be further supported by the significantly lower Z-score observed at LS in the rowers with history of oligo/amenorrhea compared to those without, and the positive association between total lifetime menses and Z-scores at LS and FN found in this study. Previous studies have shown similar findings [4, 46].

In line with the practices of coaches working with rowers in Great Britain [49], the rowers in this study engaged in strength and power training, predominately consisting of squats, cleans and lower-body plyometrics. The nature of the sport, and the direction of

1  
2  
3 force application, dictates that these pulling movements and closed chain exercises are  
4  
5 indeed rational and explains their routine recommendation [50]. Specifically, Ebben [51]  
6  
7 reported that an 8-week strength and power programme using these, improved time,  
8  
9 power and power per stroke during 2000m ergometer rowing. Unsurprisingly, pushing  
10  
11 based strength exercises for the upper-body, such as the bench press, rank quite low on  
12  
13 importance, and upper-body plyometrics generally do not feature [49]. From a training  
14  
15 specificity and performance-based point of view, the reasons for this appear sound.  
16  
17 However, of a bone health perspective, such a focused approach may be contested. The  
18  
19 results of this study and that of others [17, 52] have reported low BMD in the radius of  
20  
21 athletes, suggesting that current training paradigms may not address this appropriately  
22  
23 and perhaps fitness coaches should also address the current and future health of their  
24  
25 athletes. At times, this will require a non-sport specific approach.  
26  
27  
28  
29  
30  
31  
32

33 Specifically, in this study eight rowers had low BMD at the radius ( $Z < -1$ ) and it has  
34  
35 been recommended that a Z-score of  $< -1.0$  in an athlete warrants further investigation,  
36  
37 even in the absence of prior fracture [5]. The marked incidence of low BMD at radius  
38  
39 might suggest that the stress applied on the upper limb skeleton through joint-reaction  
40  
41 forces, generated during the rowing and/or the strength and power training undertaken  
42  
43 by the rowers in this study were not sufficient to elicit an increase in BMD or maintain it  
44  
45 to normal physiological levels [53]. It might also suggest that these tensile forces were  
46  
47 insufficient to counteract the negative effects of low energy availability on BMD [3-5,  
48  
49 11] possibly induced by intentional weight loss methods, a common practice in  
50  
51 lightweight rowers as seen here and in previous research [1, 36]. Furthermore, low  
52  
53 radius BMD might reflect the dissipation/diversion of BMD to weight-bearing sites, at  
54  
55  
56  
57  
58  
59  
60

1  
2  
3 the expense of non-weight bearing sites, such as the radius [52]. These findings  
4  
5 reinforce the tenet that bone mineral acquisition obeys a principle of specificity [52, 54]  
6  
7 and that the effects of joint reaction forces on bone formation are not as effective as  
8  
9 those observed through ground reaction forces generated during dynamic sports and /or  
10  
11 activities like running, jumping, kicking, tennis, punching and plyometrics which can  
12  
13 incorporate multidimensional (non-conventional) high peak loading compressing strains  
14  
15 distribution into the bone [53-55].  
16  
17  
18  
19

20  
21 In summary, exercises that directly target the arms such as the bench press and  
22  
23 plyometric push-ups for example, may help in the modelling/remodeling of the bone.  
24  
25 This comes into contrast with the sport-specificity theorem and the authors of this study  
26  
27 strongly recommend the implementation of supplemental non-sport specific exercises in  
28  
29 the training programmes of rowers and other athletes, that particularly suffer from low  
30  
31 radius BMD, could be a promising means of maximizing bone accrual and health, and  
32  
33 possibly reducing the incidence of skeletal fractures later in life.  
34  
35  
36  
37  
38  
39

40  
41 Little is known about the long-term effects of DE and oligo/amenorrhea on BMD. In  
42  
43 retired rowers with a history of oligo/amenorrhea, despite resuming normal menses,  
44  
45 their Z-scores at LS and total body were significantly lower than those who had always  
46  
47 been eumenorrheic. This corroborates existing body of knowledge, which suggests that  
48  
49 deficits in BMD may be irreversible [13, 32, 33]. Longitudinal study on a higher number  
50  
51 of female lightweight rowers is required to understand this issue more adequately.  
52  
53  
54  
55  
56  
57  
58  
59  
60

1  
2 An incidence of rib stress fractures in male rowers of up to 12% has been reported [29].  
3  
4 Seven (32%) of participants in this study had history of rib pain lasting 2-8wk (5.1  
5  
6  $\pm 2.9$ wk). Whilst these participants had no radiographic evidence to confirm diagnosis of  
7  
8 rib stress fracture, our study suggests the incidence of rib pain is a common complaint in  
9  
10 female lightweight rowers (2.7 times more common than male rowers) and chronic chest  
11  
12 wall pain in rowers is almost always the result of rib stress fractures as suggested by  
13  
14 Strayer [56]. However, a subsequent study reported that athletes tend to self-report a  
15  
16 higher percentage on stress fractures (14.0%) compared to those diagnosed with stress  
17  
18 fractures (8.1%) ( $P < 0.001$ ), indicating that self-reporting of stress fractures has low  
19  
20 validity [57]. Due to the retrospective nature of this study in terms of assessing rib stress  
21  
22 fractures incidence, it was not possible to make a clinical diagnosis. In this study active  
23  
24 and retired rowers with history of rib pain had significantly lower LS and total body Z-  
25  
26 score values than those without history, which possibly suggests that low BMD may  
27  
28 play a role in the aetiology of exercise-induced rib stress fractures in female lightweight  
29  
30 rowers. Interestingly, Nevill et al. [52] reported significant correlations ( $P < 0.05$ )  
31  
32 between BMD recorded at ribs, thoracic and lumbar spine, pelvis, legs, hip and arms.  
33  
34 This study's results are in agreement with others [19, 29, 30], although the association  
35  
36 between low BMD and fractures has been established in postmenopausal women with  
37  
38 osteoporosis [58] and not in premenopausal.  
39  
40 Generalisations for elite female lightweight rowers are limited by the small sample size,  
41  
42 however, lightweight rowing is a "minority" sport reflected by the relatively small  
43  
44 number (79) of female lightweight rowers identified to participate in National level  
45  
46 competition during the study year. Therefore, further research is required to verify the  
47  
48 findings from this study. However, future research should focus on measuring energy  
49  
50  
51  
52  
53  
54  
55  
56  
57  
58  
59  
60

1  
2 input versus energy output and assess in more detail, calcium, anti-inflammatory  
3 medications, vitamin A and D supplemental intake and the methods and behaviours  
4 associated with IWL. The establishment of normal BMD reference ranges in athletes is  
5 needed since the application of a reference range based on the general non-athletic  
6 population may not be appropriate [17]. Finally, the effect of upper body resistance and  
7 plyometrics training on BMD should be investigated to determine if this could counter  
8 the negative effects of DE and oligo/amenorrhea.  
9  
10  
11  
12  
13  
14  
15  
16  
17  
18  
19  
20

21 This study suggests that lightweight rowing rules may be partly responsible for resultant  
22 high levels of DE, high rates of oligo/amenorrhea, BMD deficiencies which are  
23 correlated with number of lifetime menses, and the tendency to have DE after  
24 retirement. Apparent DE vulnerability of lightweight female rowers commencing  
25 training at a younger age is of great concern. Lightweight female rowing rules mean that  
26 any athlete above the height of 175cm meeting the mean target weight of 57kg would be  
27 underweight with a BMI of <18.5. We would therefore encourage lightweight rowing to  
28 embrace sports injury prevention and provide coaches and athletes with appropriate  
29 multidisciplinary nutritional and psychological support to prevent DE and the  
30 development of the Triad, and perhaps to also consider changing the weight rules to  
31 discourage unhealthy weight loss practices.  
32  
33  
34  
35  
36  
37  
38  
39  
40  
41  
42  
43  
44  
45  
46  
47  
48  
49  
50  
51  
52  
53  
54  
55  
56  
57  
58  
59  
60

### What are the new findings

- This study confirms the co-existence of reduced BMD, oligo/amenorrhea, disordered eating and intentional weight loss, in UK elite female lightweight rowers.
- EAT-26 scores were associated with the amount of intentional weight loss, which suggests that intentional weight loss increases the likelihood of engaging in DE behaviours in active rowers.
- Active rowers with DE symptoms, had started rowing at a significantly younger age ( $10.6 \pm 3.1$ yr) than those without DE ( $18.3 \pm 4.9$ yr), which suggests involvement in high level training at a young and vulnerable age (all rowers achieved national and international level) is significantly associated with risk to DE attitudes.
- Only 2/12 (17%) active compared to 4/9 (44%) retired reported to have received professional nutritional support for rowing and weight management.

### How might it impact on clinical practice in the near future

- Individuals considering rowing in a lightweight category may benefit from assessment and monitoring for physical and psychological health risk and their suitability and sport participation safety by a trained sports medicine physician/scientist.
- If considered that they can safely achieve the required weight loss then they should be supported with nutritional guidance and regular monitoring of energy availability, DE and assessment of menstrual function.

- Athletes and coaches should be educated about the risks of DE, low energy availability and menstrual dysfunction on systemic health to help in the prevention and treatment of the Triad in lightweight rowers.
- Nutritional guidance and psychological support should be offered at a young age to minimize DE and health related risks, and supplemental strength and conditioning training that involves non-sport specific exercises that distribute multidimensional high peak strains on the upper body skeleton is likely to elicit bone health and performance benefits for female lightweight rowers.



**Contributorship statement:**

LD, AR and RL-S conceived the idea for the study and prepared the methods. LD completed the scanning and analysed it. LD, AR and RL-S collected the data and analysed it. LD, AR and RL-S drafted the initial paper and RW, AT, LH and NJ contributed with further critical drafting. All authors critically revised and approved the final version of the manuscript.

**Funding:** No funding.

**References**

- 1 Rumball JS, Lebrun CM, De Ciacca SR, et al. Rowing Injuries. *Sports Med* 2005;**35**:537-55.
- 2 Slater GJ, Rice AJ, Jujika I, et al. Physique traits of lightweight rowers and their relationship to competitive success. *Brit J Sports Med* 2005;**39**:736-41.
- 3 Talbott SM, Shapses SA. Fasting and energy intake influence bone turnover in lightweight male rowers. *Int J Sport Nut* 1998;**8**:377-87.

1  
2  
3  
4  
5 4 Zanker CL, Swaine IL. Relation between bone turnover, oestradiol, and energy  
6  
7 balance in women distance runners. *Brit J Sports Med* 1998;**32**:167-71.  
8  
9

10  
11  
12 5 Nattiv A, Loucks AB, Manore MM, et al. American College of Sports Medicine  
13  
14 position stand: The female athlete triad. *Med Sci Sports Exerc* 2007;**39**:1867-82.  
15  
16

17  
18  
19 6 Burr DB, Milgrom C. *Musculoskeletal Fatigue and Stress Fractures*. Boca Raton:  
20  
21 CRC Press 2001.  
22  
23

24  
25  
26 7 Hoch AZ, Papanek P, Szabo A, et al. Association between the female athlete triad and  
27  
28 endothelial dysfunction in dancers. *Clin J Sport Med* 2011;**21**:119-25.  
29  
30

31  
32  
33 8 Flier JS. Clinical review 94: What's in a name? In search of leptin's physiologic role.  
34  
35 *J Clin Endocrinol Metab* 1998;**83**:1407-13.  
36  
37

38  
39  
40 9 Zanker CL, Swaine IL. Responses of bone turnover markers to repeated endurance  
41  
42 running in humans under conditions of energy balance or energy restriction. *Eur J Appl*  
43  
44 *Physiol* 2000;**83**:434-40.  
45  
46

47  
48  
49 10 Eriksen EF, Colvard DS, Berg NJ, et al. Evidence of oestrogen receptors in normal  
50  
51 human osteoblasts. *Science* 1988;**241**:84-6.  
52  
53  
54  
55  
56  
57  
58  
59  
60

1  
2  
3 11 Ihle R, Louks AB. Dose–response relationships between energy availability and bone  
4 turnover in young exercising women. *J Bone Miner Res* 2004;**19**:1231-40.  
5  
6

7  
8  
9 12 Joy EA, Campbell D. Stress fractures in the female athlete. *Curr Sports Med Rep*  
10 2005;**4**:323-8.  
11  
12

13  
14  
15 13 Warren MP, Brooks-Gunn J, Fox RP, et al. Osteopenia in exercise-associated  
16 amenorrhea using ballet dancers as a model: A longitudinal study. *J Clin Endocrinol*  
17 2002;**87**:3162-8.  
18  
19  
20  
21  
22

23  
24  
25 14 Hoch AZ, Papanek P, Havlik HS, et al. Prevalence of the female athlete triad/tetrad  
26 in professional ballet dancers. *Med Sci Sports Exerc* 2009;**41**:524.  
27  
28  
29

30  
31  
32 15 Hoch Z, Stavrakos EJ, Schimke FJ. Prevalence of female athlete triad characteristics  
33 in a club triathlon team. *Arch Phys Med Rehabil* 2007;**88**:681-2.  
34  
35  
36

37  
38  
39 16 Cobb KL, Bachrach LK, Greendale G, et al. Disordered eating, menstrual irregularity  
40 and bone mineral density in female runners. *Med Sci Sports Exerc* 2003;**35**:711-9.  
41  
42  
43  
44

45  
46  
47 17 Pollock P, Grogan C, Perry M, et al. Bone-mineral density and other features of the  
48 female athlete triad in elite endurance runners: A longitudinal and cross-sectional  
49 observational study. *Int J Sport Nut Exerc Metab* 2010;**20**:418-26.  
50  
51  
52  
53  
54  
55  
56  
57  
58  
59  
60

1  
2  
3 18 Schtscherbyna A, Soares EA, de Oliveira FP, et al. Female athlete triad in elite  
4 swimmers of the city of Rio de Janeiro, Brazil. *Nutrition* 2009;**25**:634-9.  
5  
6

7  
8  
9  
10 19 Warden SJ, Gutschlag FR, Wajswelner H, et al. Aetiology of rib stress fractures in  
11 rowers. *Sports Med* 2002;**32**:819-36.  
12  
13

14  
15  
16  
17 20 Nattiv A, Agostini R, Drinkwater B, et al. The female athlete triad: The inter-  
18 relatedness of disordered eating, amenorrhea, and osteoporosis. *Clin Sports Med*  
19  
20 1994;**13**:405-18.  
21  
22

23  
24  
25  
26 21 Sundgot-Borgen J, Torstveit MK. Prevalence of eating disorders in elite athletes is  
27 higher than in the general population. *Clin J Sport Med* 2004;**14**:25-32.  
28  
29

30  
31  
32  
33 22 Currie A, Morse ED. Eating disorders in athletes: managing the risks. *Clin Sports*  
34  
35 *Med* 2005;**24**:871-83.  
36  
37

38  
39  
40 23 Byrne S, McClean N. Elite athletes: effects of the pressure to be thin. *J Sci Med Sport*  
41  
42 2002;**5**:80-94.  
43  
44

45  
46  
47 24 Terry PC, Lane AM, Warren L. Eating attitudes, body shape perceptions and mood  
48 of elite rowers. *J Sci Med Sport* 1999;**2**:67-77.  
49  
50

51  
52  
53  
54 25 Terry PC, Waite J. Eating attitudes and body shape perceptions among elite rowers:  
55 effects of age, gender and weight category. *Aust J Sci Med Sport* 1996;**28**:3-6.  
56  
57  
58  
59  
60

1  
2  
3  
4  
5 26 Sundgot-Borgen J. Prevalence of eating disorders in elite female athletes. *Int J Sport*  
6  
7 *Nutr* 1993;**3**:29-40.  
8  
9

10  
11 27 Rauh MJ, Nichols JF, Barrack MT. Relationships among injury and disordered  
12 eating, menstrual dysfunction, and low bone mineral density in high school athletes: a  
13 prospective study. *J Athl Train* 2010;**45**:243-52.  
14  
15  
16  
17  
18

19  
20 28 Beck TJ, Ruff CB, Shaffer RA, et al. Stress fracture in military recruits: gender  
21 differences in muscle and bone susceptibility factors. *Bone* 2000;**27**:437-44.  
22  
23  
24  
25  
26

27  
28 29 Vinther A, Kanstrup IL, Christiansen E, et al. Exercise-induced rib stress fractures:  
29 influence of reduced bone mineral density. *Scand J Med Sci Sports* 2005;**15**:95-9.  
30  
31  
32  
33  
34

35 30 Hickey GJ, Fricker PA, McDonald WA. Injuries to elite rowers over a 10-year  
36 period. *Med Sci Sports Exerc* 1997;**29**:1567-72.  
37  
38  
39  
40  
41

42 31 Budget R, Hettinga DM, Steinacker J. Sports Medicine. In: Secher NH, Volianitis S.  
43 eds. *Rowing*. London: Blackwell 2007:124-140.  
44  
45  
46  
47  
48

49 32 Keen AD, Drinkwater BL. Irreversible bone loss in former amenorrheic athletes.  
50  
51 *Osteoporosis Int* 1997;**7**:311-5.  
52  
53  
54  
55  
56  
57  
58  
59  
60

1  
2  
3 33 Barrack MT, Van Loan MD, Rauh MJ, et al. Body mass, training, menses, and bone  
4  
5 in adolescent runners: a 3-yr follow-up. *Med Sci Sports Exerc* 2011;**43**:959-66.  
6  
7

8  
9  
10 34 Garner DM, Olmsted MP, Bohr Y, et al. The eating attitudes test: psychometric  
11  
12 features and clinical correlates. *Psychol Med* 1982;**12**:871-8.  
13

14  
15  
16  
17 35 American Psychiatric Association, eds. *Diagnostic and statistical manual of mental*  
18  
19 *disorders: DSM-IV-TR®*. Washington DC: American Psychiatric Association 2000.  
20  
21

22  
23  
24 36 Karlson KA, Becker CB, Merkur A. Prevalence of eating disordered behaviour in  
25  
26 collegiate lightweight women rowers and distance runners. *Clin J Sports Med*  
27  
28 2001;**11**:32-7.  
29

30  
31  
32  
33 37 Sundgot-Borgen J. Risk and trigger factors for the development of eating disorders in  
34  
35 female elite athletes. *Med Sci Sports Exerc* 1994;**26**:414-9.  
36  
37

38  
39  
40 38 Smolak L, Murnen SK, Ruble AE. Female athletes and eating problems: a meta-  
41  
42 analysis. *Int J Eating Disord* 2000;**27**:371-80.  
43  
44

45  
46  
47 39 Martinsen M, Sundgot-Borgen J. Higher prevalence of eating disorders among  
48  
49 adolescent elite athletes than controls. *Med Sci Sports Exerc* 2013;**45**:1188-97.  
50  
51

1  
2  
3 40 Thiel A, Gottfried H, Hesse FW. Subclinical eating disorders in male athletes: a  
4  
5 study of the low weight category in rowers and wrestlers. *Acta Psychiatr Scand*  
6  
7 1993;**88**:259-65.  
8  
9

10  
11  
12 41 Beals KA, Manore MM. Behavioral, psychological, and physical characteristics of  
13  
14 female athletes with subclinical eating disorders. *Int J Sport Nutr Exerc Metab*  
15  
16 2000;**10**:128-43.  
17  
18

19  
20  
21 42 Sundgot-Borgen J, Klungland M. The female athlete triad and the effect of  
22  
23 preventative work. *Med Sci Sports Exerc* 1998;**30**:S181.  
24  
25

26  
27  
28 43 Emery CA, Hagel B, Morrongiello B. Injury prevention in child and adolescent sport:  
29  
30 whose responsibility is it? *Clin J Sport Med* 2006;**6**:514-21.  
31  
32

33  
34  
35 44 Carney CP, Andersen AE. Eating disorders. Guide to medical evaluation and  
36  
37 complications. *Psychiatr Clin North Am* 1996;**19**:657-79.  
38  
39

40  
41  
42 45 Smock AJ, Hughes JM, Popp KL, et al. Bone volumetric density, geometry and  
43  
44 strength in female and male collegiate runners. *Med Sci Sports Exerc* 2009;**41**:2026-32.  
45  
46  
47

48  
49  
50 46 Drinkwater BL, Nilson K, Chesnut CH 3rd, et al. Bone mineral content of  
51  
52 amenorrheic and eumenorrheic athletes. *N Engl J Med* 1984;**2**:277-81.  
53  
54  
55

1  
2  
3 47 Lariviere JA, Robinson TL, Snow CM. Spine bone mineral density increases in  
4  
5 experienced but not novice collegiate female rowers. *Med Sci Sports Exerc*  
6  
7 2003;**35**:1740-4.  
8

9  
10  
11 48 Wolman RL, Clark P, McNally E, et al. Menstrual state and exercise as determinants  
12  
13 of spinal trabecular bone density in female athletes. *Brit Med Journal* 1990;**301**:516-8.  
14  
15

16  
17  
18 49 Gee TI, Olsen PD, Berger NJ, et al. Strength and conditioning practices in rowing. *J*  
19  
20 *Strength Cond Res* 2011;**25**:668-82.  
21  
22

23  
24  
25 50 Ivey P, Oakley J, Hagerman P. Strength training for the preparatory phase in  
26  
27 collegiate women's rowing. *Strength & Cond Journal* 2004;**26**:10-5.  
28  
29

30  
31  
32 51 Ebben WP, Kindler AG, Chirdon KA, et al. The effect of high-load vs. high-  
33  
34 repetition training on endurance performance. *J Strength Cond Res* 2004;**18**:513-7.  
35  
36

37  
38  
39 52 Nevill AM, Burrows M, Holder RL, et al. Does lower-body BMD develop at the  
40  
41 expense of upper-body BMD in female runners? *Med Sci Sports Exerc* 2003;**35**:1733-9.  
42  
43

44  
45  
46 53 Kohrt WM, Ehsani AA, Birge SJ Jr. Effects of exercise involving predominantly  
47  
48 either joint-reaction or ground-reaction forces on bone mineral density in older women.  
49  
50 *J Bone Miner Res* 1997;**12**:1253-61.  
51  
52



1  
2  
3 54 Sanchis-Moysi J, Dorado C, Olmedillas H, et al. Bone and lean mass inter-arm  
4  
5 asymmetries in young male tennis players depend on training frequency. *Eur J Appl*  
6  
7 *Physiol* 2010;**110**:83-90.

8  
9  
10  
11 55 Platen P, Chae EH, Antz R, et al. Bone mineral density in top level male athletes of  
12  
13 different sports. *Eur J Sport Sci* 2001;**1**:1-15.

14  
15  
16 56 Strayer LM. The myth of the intercostal muscle pull. *Am Rowing* 1990;**22**:42-4.

17  
18  
19 57 Øyen J, Torstveit MK, Sundgot-Borgen J. Self-reported versus diagnosed stress  
20  
21 fractures in Norwegian female elite athletes. *J Sports Sci Med* 2009;**8**:130-5.

22  
23  
24 58 Melton LJ 3rd, Atkinson EJ, O'Fallon WM et al. Long-term fracture prediction by  
25  
26 bone mineral assessed at different skeletal sites. *J Bone Miner Res* 1993;**8**:1227-33.  
27  
28  
29  
30  
31  
32  
33  
34  
35  
36  
37  
38  
39  
40  
41  
42  
43  
44  
45  
46  
47  
48  
49  
50  
51  
52  
53  
54  
55  
56  
57  
58  
59  
60

Figure 1. BMD Z-scores (Mean  $\pm$ SD) at total body (TB), lumbar spine (LS), radius and neck of femur (NF) in rowers with and without a history of oligo/amenorrhea.

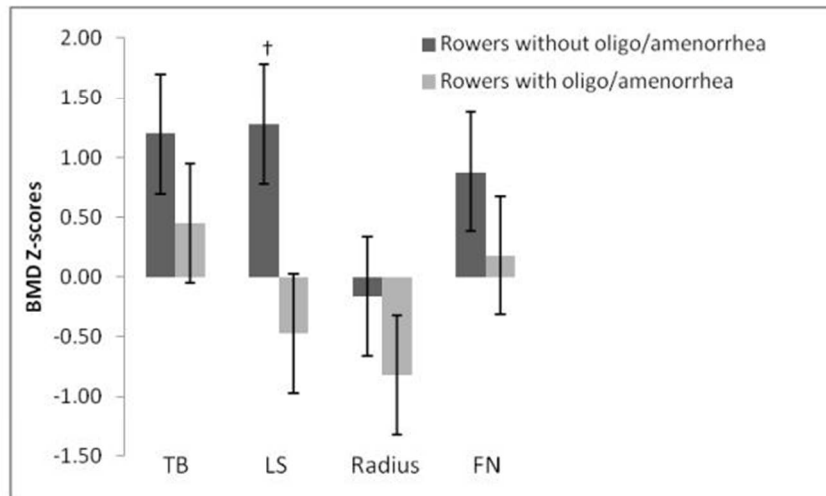

†Significant difference ( $p < 0.001$ ) between rowers with and without a history of oligo/amenorrhea.

BMD Z-scores (Mean  $\pm$ SD) at total body (TB), lumbar spine (LS), radius and neck of femur (NF) in rowers with and without a history of oligo/amenorrhea.  
254x190mm (72 x 72 DPI)

Figure 2. Relationship between the amount of intentional weight loss and EAT-26 score, a measure of DE, in active rowers, ( $r=0.720$ ,  $p<0.05$ ).

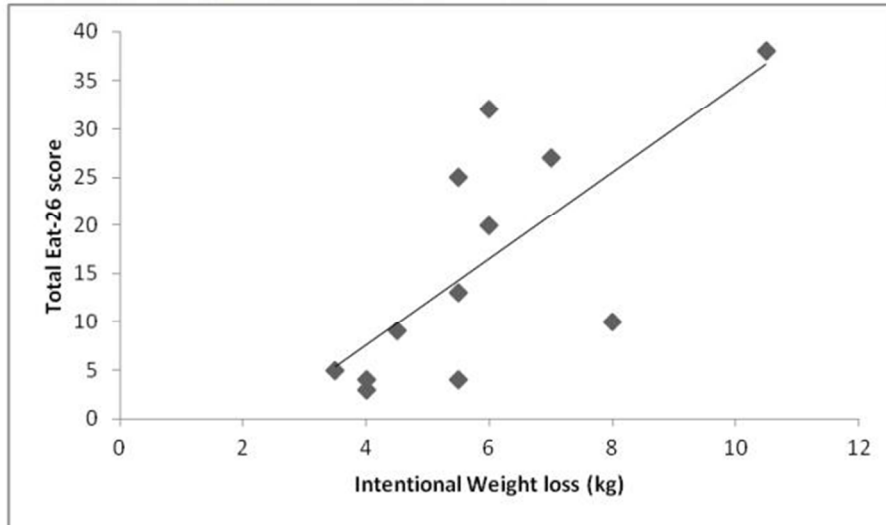

254x190mm (72 x 72 DPI)

ew only

Figure 3. BMD Z-scores (Mean  $\pm$ SD) at total body (TB), lumbar spine (LS), radius and neck of femur (NF) in rowers with and without a history of rib pain.

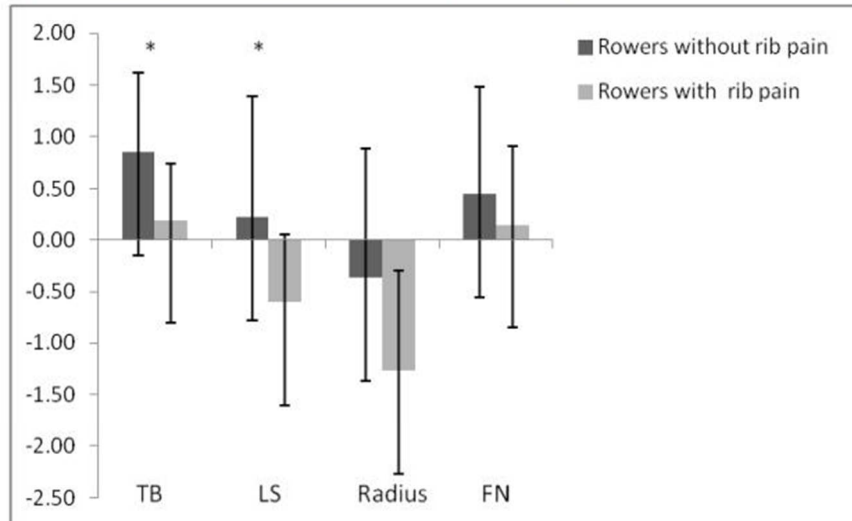

\*Significant difference ( $P < 0.05$ ) between rowers with and without a history of rib pain.

\*Significant difference ( $P < 0.05$ ) between rowers with and without a history of rib pain.  
254x190mm (72 x 72 DPI)

**STROBE 2007 (v4) checklist of items to be included in reports of observational studies in epidemiology\***  
**Checklist for cohort, case-control, and cross-sectional studies (combined)**

| Section/Topic             | Item # | Recommendation                                                                                                                                                                                                                                                                                                                                                                                                                                                         | Reported on page # |
|---------------------------|--------|------------------------------------------------------------------------------------------------------------------------------------------------------------------------------------------------------------------------------------------------------------------------------------------------------------------------------------------------------------------------------------------------------------------------------------------------------------------------|--------------------|
| Title and abstract        | 1      | (a) Indicate the study's design with a commonly used term in the title or the abstract                                                                                                                                                                                                                                                                                                                                                                                 | 1                  |
|                           |        | (b) Provide in the abstract an informative and balanced summary of what was done and what was found                                                                                                                                                                                                                                                                                                                                                                    | 2                  |
| <b>Introduction</b>       |        |                                                                                                                                                                                                                                                                                                                                                                                                                                                                        |                    |
| Background/rationale      | 2      | Explain the scientific background and rationale for the investigation being reported                                                                                                                                                                                                                                                                                                                                                                                   | 3-5                |
| Objectives                | 3      | State specific objectives, including any pre-specified hypotheses                                                                                                                                                                                                                                                                                                                                                                                                      | 5                  |
| <b>Methods</b>            |        |                                                                                                                                                                                                                                                                                                                                                                                                                                                                        |                    |
| Study design              | 4      | Present key elements of study design early in the paper                                                                                                                                                                                                                                                                                                                                                                                                                | 5-9                |
| Setting                   | 5      | Describe the setting, locations, and relevant dates, including periods of recruitment, exposure, follow-up, and data collection                                                                                                                                                                                                                                                                                                                                        | 5                  |
| Participants              | 6      | (a) <i>Cohort study</i> —Give the eligibility criteria, and the sources and methods of selection of participants. Describe methods of follow-up<br><i>Case-control study</i> —Give the eligibility criteria, and the sources and methods of case ascertainment and control selection. Give the rationale for the choice of cases and controls<br><i>Cross-sectional study</i> —Give the eligibility criteria, and the sources and methods of selection of participants | 6                  |
|                           |        | (b) <i>Cohort study</i> —For matched studies, give matching criteria and number of exposed and unexposed<br><i>Case-control study</i> —For matched studies, give matching criteria and the number of controls per case                                                                                                                                                                                                                                                 |                    |
| Variables                 | 7      | Clearly define all outcomes, exposures, predictors, potential confounders, and effect modifiers. Give diagnostic criteria, if applicable                                                                                                                                                                                                                                                                                                                               | 7-10               |
| Data sources/ measurement | 8*     | For each variable of interest, give sources of data and details of methods of assessment (measurement). Describe comparability of assessment methods if there is more than one group                                                                                                                                                                                                                                                                                   |                    |
| Bias                      | 9      | Describe any efforts to address potential sources of bias                                                                                                                                                                                                                                                                                                                                                                                                              | 6,7                |
| Study size                | 10     | Explain how the study size was arrived at                                                                                                                                                                                                                                                                                                                                                                                                                              | 5,6                |
| Quantitative variables    | 11     | Explain how quantitative variables were handled in the analyses. If applicable, describe which groupings were chosen and why                                                                                                                                                                                                                                                                                                                                           | 10                 |
| Statistical methods       | 12     | (a) Describe all statistical methods, including those used to control for confounding                                                                                                                                                                                                                                                                                                                                                                                  | 10                 |
|                           |        | (b) Describe any methods used to examine subgroups and interactions                                                                                                                                                                                                                                                                                                                                                                                                    | NA                 |
|                           |        | (c) Explain how missing data were addressed                                                                                                                                                                                                                                                                                                                                                                                                                            | 5-10               |

|                          |     |                                                                                                                                                                                                                                                                                                                                                                                                               |                           |
|--------------------------|-----|---------------------------------------------------------------------------------------------------------------------------------------------------------------------------------------------------------------------------------------------------------------------------------------------------------------------------------------------------------------------------------------------------------------|---------------------------|
|                          |     | (d) <i>Cohort study</i> —If applicable, explain how loss to follow-up was addressed<br><i>Case-control study</i> —If applicable, explain how matching of cases and controls was addressed<br><i>Cross-sectional study</i> —If applicable, describe analytical methods taking account of sampling strategy                                                                                                     |                           |
|                          |     | (e) Describe any sensitivity analyses                                                                                                                                                                                                                                                                                                                                                                         |                           |
| <b>Results</b>           |     |                                                                                                                                                                                                                                                                                                                                                                                                               |                           |
| Participants             | 13* | (a) Report numbers of individuals at each stage of study—eg numbers potentially eligible, examined for eligibility, confirmed eligible, included in the study, completing follow-up, and analysed<br>(b) Give reasons for non-participation at each stage<br>(c) Consider use of a flow diagram                                                                                                               | 5,6                       |
| Descriptive data         | 14* | (a) Give characteristics of study participants (eg demographic, clinical, social) and information on exposures and potential confounders<br>(b) Indicate number of participants with missing data for each variable of interest<br>(c) <i>Cohort study</i> —Summarise follow-up time (eg, average and total amount)                                                                                           | 11                        |
| Outcome data             | 15* | <i>Cohort study</i> —Report numbers of outcome events or summary measures over time<br><i>Case-control study</i> —Report numbers in each exposure category, or summary measures of exposure<br><i>Cross-sectional study</i> —Report numbers of outcome events or summary measures                                                                                                                             |                           |
| Main results             | 16  | (a) Give unadjusted estimates and, if applicable, confounder-adjusted estimates and their precision (eg, 95% confidence interval). Make clear which confounders were adjusted for and why they were included<br>(b) Report category boundaries when continuous variables were categorized<br>(c) If relevant, consider translating estimates of relative risk into absolute risk for a meaningful time period | 10-13                     |
| Other analyses           | 17  | Report other analyses done—eg analyses of subgroups and interactions, and sensitivity analyses                                                                                                                                                                                                                                                                                                                | 10-13                     |
| <b>Discussion</b>        |     |                                                                                                                                                                                                                                                                                                                                                                                                               |                           |
| Key results              | 18  | Summarise key results with reference to study objectives                                                                                                                                                                                                                                                                                                                                                      | Figures and tables, 10-13 |
| Limitations              | 19  | Discuss limitations of the study, taking into account sources of potential bias or imprecision. Discuss both direction and magnitude of any potential bias                                                                                                                                                                                                                                                    | 18-20                     |
| Interpretation           | 20  | Give a cautious overall interpretation of results considering objectives, limitations, multiplicity of analyses, results from similar studies, and other relevant evidence                                                                                                                                                                                                                                    | 14-18                     |
| Generalisability         | 21  | Discuss the generalisability (external validity) of the study results                                                                                                                                                                                                                                                                                                                                         | 19,20                     |
| <b>Other information</b> |     |                                                                                                                                                                                                                                                                                                                                                                                                               |                           |
| Funding                  | 22  | Give the source of funding and the role of the funders for the present study and, if applicable, for the original study on which the present article is based                                                                                                                                                                                                                                                 | No funding.20.            |

\*Give information separately for cases and controls in case-control studies and, if applicable, for exposed and unexposed groups in cohort and cross-sectional studies.

1  
2  
3  
4 **Note:** An Explanation and Elaboration article discusses each checklist item and gives methodological background and published examples of transparent reporting. The STROBE  
5 checklist is best used in conjunction with this article (freely available on the Web sites of PLoS Medicine at <http://www.plosmedicine.org/>, Annals of Internal Medicine at  
6 <http://www.annals.org/>, and Epidemiology at <http://www.epidem.com/>). Information on the STROBE Initiative is available at [www.strobe-statement.org](http://www.strobe-statement.org).  
7  
8  
9  
10  
11  
12  
13  
14  
15  
16  
17  
18  
19  
20  
21  
22  
23  
24  
25  
26  
27  
28  
29  
30  
31  
32  
33  
34  
35  
36  
37  
38  
39  
40  
41  
42  
43  
44  
45  
46  
47  
48  
49

For peer review only



**Bone mineral density, rib pain and other features of the female athlete triad in elite lightweight rowers**

|                                 |                                                                                                                                                                                                                                                                                                                                                                                                                                                                  |
|---------------------------------|------------------------------------------------------------------------------------------------------------------------------------------------------------------------------------------------------------------------------------------------------------------------------------------------------------------------------------------------------------------------------------------------------------------------------------------------------------------|
| Journal:                        | <i>BMJ Open</i>                                                                                                                                                                                                                                                                                                                                                                                                                                                  |
| Manuscript ID:                  | bmjopen-2013-004369.R1                                                                                                                                                                                                                                                                                                                                                                                                                                           |
| Article Type:                   | Research                                                                                                                                                                                                                                                                                                                                                                                                                                                         |
| Date Submitted by the Author:   | 08-Jan-2014                                                                                                                                                                                                                                                                                                                                                                                                                                                      |
| Complete List of Authors:       | Dimitriou, Lygeri; Middlesex University, London Sport Institute<br>Weiler, Richard; University College London Hospitals NHS Foundation Trust, Sport and Exercise Medicine<br>Lloyd-Smith, Rebecca; University College London,<br>Turner, Antony; Middlesex University, London Sport Institute<br>Heath, Luke; Middlesex University, London Sport Institute<br>James, Nic; Middlesex University, London Sport Institute<br>Reid, Anna; University College London, |
| <b>Primary Subject Heading</b>: | Sports and exercise medicine                                                                                                                                                                                                                                                                                                                                                                                                                                     |
| Secondary Subject Heading:      | Sports and exercise medicine                                                                                                                                                                                                                                                                                                                                                                                                                                     |
| Keywords:                       | Eating disorders < PSYCHIATRY, Physiology < BASIC SCIENCES, Orthopaedic sports trauma < ORTHOPAEDIC & TRAUMA SURGERY, SPORTS MEDICINE                                                                                                                                                                                                                                                                                                                            |
|                                 |                                                                                                                                                                                                                                                                                                                                                                                                                                                                  |

SCHOLARONE™  
Manuscripts

only



1  
2  
3 **Bone mineral density, rib pain and other features of the female athlete triad in elite**  
4 **lightweight rowers.**  
5

6  
7 Lygeri Dimitriou<sup>1</sup>, Richard Weiler<sup>2</sup>, Rebecca Lloyd-Smith<sup>3</sup>, Antony Turner<sup>1</sup>, Luke  
8 Heath<sup>1</sup>, Nic James<sup>1</sup>, Anna Reid<sup>3</sup>  
9

10  
11 <sup>1</sup>Middlesex University, London Sport Institute, London, United Kingdom,  
12

13  
14 <sup>2</sup> University College London Hospitals NHS Foundation Trust, London, United  
15  
16 Kingdom  
17

18  
19 <sup>3</sup> University College London, London, United Kingdom  
20

21 **Running Title:** The Triad in elite female lightweight rowers  
22

23 **Word count:** 4145 excluding abstract, and strengths and limitations.  
24

25  
26 Lygeri Dimitriou: [l.dimitriou@mdx.ac.uk](mailto:l.dimitriou@mdx.ac.uk); Richard Weiler: [rweiler@doctors.org.uk](mailto:rweiler@doctors.org.uk);  
27

28  
29 Rebecca Lloyd-Smith: [rlloydSmith@hotmail.com](mailto:rlloydSmith@hotmail.com); Antony Turner:  
30

31 [A.N.Turner@mdx.ac.uk](mailto:A.N.Turner@mdx.ac.uk); Luke Heath: [heath.luke@hotmail.co.uk](mailto:heath.luke@hotmail.co.uk); Nic James:  
32

33 [n.james@mdx.ac.uk](mailto:n.james@mdx.ac.uk); Anna Reid: [anna\\_reid@yahoo.com](mailto:anna_reid@yahoo.com);  
34

35  
36 Address for correspondence: Lygeri Dimitriou, Middlesex University, London Sport  
37

38 Institute, The Burroughs, Hendon, London NW4 4BT, United Kingdom, Tel: +44(0)20  
39

40 8411 4354, Fax: +44(0)20 8411 4354, email: [l.dimitriou@mdx.ac.uk](mailto:l.dimitriou@mdx.ac.uk)  
41  
42  
43  
44  
45  
46  
47  
48  
49  
50  
51  
52  
53  
54  
55  
56  
57  
58  
59  
60

## The Triad in elite female lightweight rowers

### ABSTRACT

**Objective:** To determine bone mineral density (BMD) and the associations among BMD, menstrual history, disordered eating (DE), training history, intentional weight loss and rib pain for the first time in female lightweight rowers.

**Methods:** Dual-energy X-ray absorptiometry measured total body (TB) composition and BMD at the spine, femoral neck (FN), radius and TB. Questionnaires (EAT-26) measured DE, oligo/amenorrhea years, rib pain, training history and nutritional support provision in 21 elite female lightweight rowers (12 active, 9 retired).

**Results:** DE was reported in 6 of the rowers. The active with DE started rowing younger ( $P<0.05$ ) than those without, and their amount of intentional weight loss (IWL) was associated with EAT-26 score ( $P<0.05$ ). Some participants reported a history of oligo/amenorrhea 17 (76%) and/or rib pain 7 (32%) with those with rib pain having lower spine and TB Z-scores ( $P<0.05$ ) than those without. Those with oligo/amenorrhea had lower spine Z-scores ( $P<0.01$ ) than those without. Twelve participants had low BMD; three at spine; one at FN; and eight at radius. 13% of mean total training hours ( $18.6 \pm 9.1 \text{ h} \cdot \text{week}^{-1}$ ) were spent strength training ( $2.4 \pm 2.2 \text{ h} \cdot \text{week}^{-1}$ ). **Conclusions:** Upper-body exercises incorporating multidimensional high peak bone strain were not reported and may need to be considered in their strength training to improve radial BMD. Results suggest IWL and high-level training at a young age increases the likelihood of DE and there may be a lack of quality nutritional support for these athletes.

**Key words:** DXA, menstrual dysfunction, exercise, dieting, skeletal health, fractures

### Strengths and limitations of this study

- The first multidisciplinary study to investigate the distribution of BMD, compared to parameters established in healthy non-athletic women, in association to rib pain in UK elite active and retired female lightweight rowers.
- The first multidisciplinary study that examined BMD and TB composition via DXA, menstrual history, disordered eating (DE), training history, intentional weight loss and rib pain in lightweight rowing which is a “minority” sport and understudied.
- The first study that contrasts with the sport-specificity theorem and highlights the importance of supplemental non-sport specific exercises in the training programmes of rowers and other athletes, that particularly suffer from low radius BMD, to elicit bone health and possibly reduce the incidence of skeletal fractures later in life.
- Generalisations for elite female lightweight rowers are limited by the small sample size.
- The validity of self-reported questionnaires has been critiqued on the credibility of honest responses.

## Introduction

Rowing is an Olympic sport with two weight categories: open (no weight restriction) and lightweight. To qualify for racing lightweight, female rowers must weigh-in at no more than 59kg with a crew average of no more than 57kg (International Rowing Federation). The majority of lightweight rowers restrict their diet to meet weight restrictions using both acute and chronic methods of weight-loss [1, 2]. This could lead to disordered eating (DE), chronic energy deficiency, and subsequently menstrual dysfunction and low bone mineral density (BMD) [3, 4, 5]. The latter two are associated with bone stress injuries [6] and endothelial dysfunction, a concern for future cardiovascular risk [7]. The Female Athlete Triad (the Triad) according to the American College of Sports Medicine (ACSM) revised position statement; is an association between energy availability, menstrual function, and BMD, which may have clinical manifestations including eating disorders, amenorrhea, and osteoporosis [5]. Low energy availability, with or without disordered eating, can cause amenorrhea and reduced BMD due to reductions in leptin [8], insulin like growth factor (IGF-1) [9], and oestrogen production [10]. It has been reported that when severely restricted energy availability is prolonged, from either dietary restriction or increased expenditure, irreversible reductions in BMD could result [11]. Even less severe energy restrictions could suppress bone formation, and possibly prevent young women from achieving their genetic potential for peak BMD [11].

The Triad is also associated with increased incidence of musculoskeletal injuries and higher stress fracture risk [12] and is prevalent in sports where leanness is considered important [5]. The existence of the Triad is documented in dancers [13, 14], triathletes [15], distance runners [16, 17] and swimmers [18] but not in female lightweight rowers,

1  
2  
3 who commonly have a higher risk for rib stress fractures [19], and where leanness and  
4  
5 weight control determine eligibility to compete and participate in the sport.  
6  
7

8  
9  
10 Disordered eating may describe the array of abnormal and harmful sub-clinical eating  
11  
12 attitudes used to lose weight or maintain low weight, and is thought to affect up to two-  
13  
14 thirds of young female athletes [20]. Sundgot-Borgen and Torstveit's, [21] more recent  
15  
16 and large study on 572 elite female athletes showed a 20% prevalence of eating  
17  
18 disorders, indicating a significant clinical issue for the health of a great amount of  
19  
20 athletes. Eating disorders have one of the highest mortality rates of mental illnesses [22],  
21  
22 and have been reported to be more prevalent (31%) in elite female athletes involved in  
23  
24 sports emphasising leanness compared to those athletes (8%) involved in sports with  
25  
26 less emphasis on leanness [23]. Studies on rowing have shown that lightweights are at a  
27  
28 higher eating disorder risk than heavyweights, as identified by the Eating Attitudes Test-  
29  
30 26 (EAT-26), [24, 25]. This is in accord with the higher prevalence of DE in "weight-  
31  
32 category" sports which was reported by Sundgot-Borgen's, [26] study on 522 elite  
33  
34 female athletes from 35 sports and 448 nonathletic controls. An incidence of 12% [24]  
35  
36 and 16.2% [25] of DE has been reported in lightweight rowers in the past. The  
37  
38 interlinked nature between DE, menstrual dysfunction and BMD is demonstrated in  
39  
40 studies that established a relationship between DE and menstrual dysfunction [4, 16],  
41  
42 between menstrual dysfunction and low BMD [3, 27] and between DE and low BMD in  
43  
44 the absence of menstrual dysfunction [4, 16, 27]. Low BMD is also linked with  
45  
46 increased incidence of stress fractures in male and female Marine recruits [28] and with  
47  
48 exercise-induced rib stress fractures in male lightweight rowers [29]. Although one of  
49  
50 the most common injuries in female rowers is rib stress fractures, its aetiology remains  
51  
52  
53  
54  
55  
56  
57  
58  
59  
60

1  
2  
3 unclear [19]. Rib stress fractures are less common in men [30], suggesting that low  
4  
5 oestrogen levels, low BMD or factors associated with the Triad might be causative for  
6  
7 rib stress fractures in female rowers.  
8  
9

10  
11  
12 To date, no studies have investigated BMD in relation to rib stress fractures in female  
13  
14 lightweight rowers. This reinforces the view of [31], that the pathology and prevention  
15  
16 of rib stress fractures is a worthy area of research in rowing. Little is known about the  
17  
18 possible long-term implications of the Triad but it appears that the effects on BMD  
19  
20 might be partially irreversible [13, 32, 33].  
21  
22  
23

24  
25  
26 The aims of the present study were therefore to investigate: 1) The distribution of BMD  
27  
28 for the first time in UK elite active and retired female lightweight rowers compared to  
29  
30 the parameters established in healthy non-athletic women; 2) the associations among  
31  
32 BMD, menstrual history, training history, DE, intentional weight loss and rib pain and  
33  
34 3) assess whether any past DE symptoms and menstrual dysfunction continue after  
35  
36 retirement.  
37  
38  
39  
40  
41  
42

## 43 **Methods**

### 44 **Ethics**

45  
46  
47 This study was approved by the Health Studies Ethics Committee at Middlesex  
48  
49 University. This research received no specific grant from any funding agency in the  
50  
51 public, commercial or not-for-profit sectors. Details of the study's aims, methods and  
52  
53 testing procedures were explained to each participant, before a written, informed  
54  
55 consent was obtained.  
56  
57  
58  
59  
60

## Participants

Participants were recruited from responses to recruitment advertisements for current and retired lightweight rowers offering free determination of BMD and TB composition in rowing clubs and a rowing magazine. No mention of DE, menstrual disorders and other aspects of the Triad were included in the advert to avoid possible sample selection bias. The year of this study only 79 UK female lightweight rowers were identified to participate in national and international level competitions. Twenty-nine Caucasian female lightweight rowers, from 9 different clubs volunteered to participate in this study. Only 21 (12 active, 9 retired) met the study's criteria and volunteered for the study. Inclusion criteria were females aged over 18 years who had rowed competitively in lightweight category for no less than one year. Participants were excluded if they had a history of bone disease, used medications known to influence BMD (e.g., corticosteroids, antidepressants, thiazolidinediones, bisphosphonates, NSAIDs and chemotherapy) or if they were pregnant, lactating or post-menopausal. Two rowers were excluded and six withdraw for logistic reasons. Rowing competition level was: 5 international (2 active) and 16 national (10 active) level. All were non-smokers and their mean weekly alcohol consumption was  $5.8 \pm 1.2$  units per week. None reported vitamin D and calcium supplements intake and all but two did not regularly (3-4/week) eat products containing calcium.

## Questionnaires:

### EAT-26 and Pathogenic Weight Control Strategies

1  
2  
3  
4  
5  
6  
7  
8  
9  
10  
11  
12  
13  
14  
15  
16  
17  
18  
19  
20  
21  
22  
23  
24  
25  
26  
27  
28  
29  
30  
31  
32  
33  
34  
35  
36  
37  
38  
39  
40  
41  
42  
43  
44  
45  
46  
47  
48  
49  
50  
51  
52  
53  
54  
55  
56  
57  
58  
59  
60

Symptoms and characteristics of eating disorders were assessed by the EAT-26, a 26-item inventory with strong psychometric properties [34]. Thirteen items relate to “dieting” behaviour, six to “Bulimia and Food Preoccupation” and seven to “Oral Control”. The 26 items of the EAT-26 inventory were rated on a 6-point response scale as described in Garner et al. [34]. The score can range from 0-78. A score of 20 or above is considered indicative of DE [34].

Self-reported questionnaires assessed whether participants had been engaged in any pathogenic weight control strategies such as vomiting and/or use of laxatives to induce weight loss within the last 6 months. Present or past engagement in binge-eating behaviour, eating more than other people would in the same situation [35] and whether they had previously been diagnosed with an eating disorder were also assessed. Retired rowers were assessed to observe whether any past pathogenic weight control strategies continued after retirement.

### **Menstrual History Questionnaire**

All rowers reported their age of menarche and number of menses for each year after menarche choosing from the following options: amenorrhea (0-3), oligomenorrhea (4-9) and eumenorrhea (10-13) [16]. Total lifetime menses (years) and number of years of amenorrhea, and oligomenorrhea was calculated as described in Cobb et al. [16] and normalised for age by dividing the number of years of each of the above menstrual variables with current age. Due to the small sample size, menstrual history status was categorised into two groups of oligo/amenorrheic (those with history of oligo/amenorrhea) and eumenorrheic (those without). Retired rowers were assessed to observe whether any history of oligo/amenorrhea continued after retirement.



### Additional Questionnaires

Self-reported questionnaires assessed demographic data, including details of sporting history, mode of training including type of resistance training exercises and average weekly training volume (hours) at highest competitive level for both retired and active rowers, level of competition, medical history, use of medications, supplements and oral contraceptives (OCA), smoking, alcohol intake and weight loss. Duration of OCA use was normalised for gynecological age by dividing the number of years of OCA use with gynecological age. History of injury was reported by drawing the area of symptoms on a body chart and answering questions about cause of injury, duration of symptoms, and diagnosis. History, duration and cause of rib pain were also recorded. Participants were also asked whether they had ever been provided with nutritional and/or weight management advice from coach/club. Retired rowers gave details of physical activity since retiring from lightweight rowing. Questionnaire details were verbally explained to each participant in conjunction with written instructions. Whilst participants were completing the questionnaires investigators were present to clarify any issues/questions and tried to ensure that the answers were as accurate as possible.

### Physical and Bone Measurements

Bone mineral density ( $\text{g}\cdot\text{cm}^{-2}$ ) at the posterior anterior (PA) L2-4 lumbar spine (LS); PA femoral neck (FN); dominant arm distal radius; total body and body composition (lean and fat mass) were measured by DXA (fan beam, Lunar DPX-L series GE Medical systems, Lunar Madison, WI USA). The in-house coefficient of variation of the BMD measurements ranged from 0.5-0-1.4%. The scanner was calibrated using a spine

phantom at the start of each day of testing and its performance was followed with the labs quality assurance protocol. Z-scores were calculated using the manufacturer-supplied reference data (Lunar enCORE© USA/European reference data) set to compare individuals BMD values to age and sex-matched controls. The ACSM defines the term 'low BMD' as a Z-score between -1 and -2, and 'osteoporosis' a Z-score  $\leq -2$  together with secondary risk factors for fracture (e.g., chronic malnutrition, eating disorders, hypoestrogenism, hypogonadism, glucocorticoid exposure, and previous fractures,[3]).

All participants were requested to refrain from heavy physical activity 24 h before screening to minimize the effect of fluctuations in hydration status on body composition measurements. Participants' height (m) and body mass (kg) were measured using standard stadiometers and balance beam scales, respectively. Body mass index (BMI) was calculated as kilograms per square meter ( $\text{kg}\cdot\text{m}^{-2}$ ). All anthropometric measurements, scanning and analyses were performed by the same technician using the same equipment.

### Statistical Analyses

Statistical analyses were performed using SPSS version 16.0. Values are reported as means  $\pm$  SD. Statistical significance was set at  $P < 0.05$ . Levene's test was used to assess equality of variances in the different groups. Violations of the equality of variances assumption were corrected using the P-value calculated for equal variances not assumed. A General Linear Model was used to determine whether Z-scores, years of training, age of menarche, and amount of intentional weight loss differ: 1) between rowers with and without history of oligo/amenorrhea or rib pain, and 2) between active rowers that

1  
2 scored  $\geq 20$  and active rowers that scored  $< 20$  on the EAT-26. When the Z-scores were  
3  
4 analysed to assess for differences between participants, data was adjusted/controlled for  
5  
6 BMI [36], by fitting an ANCOVA to the data.  
7  
8  
9

10  
11 Z-scores were used in the statistical analyses, as they are normative values for  
12  
13 chronological age. Pearson's correlation coefficient was used to determine significant  
14  
15 relationships between variables of interest. Any analysis performed between Z-scores  
16  
17 and other specific variables was controlled for BMI. Correlation analysis between EAT-  
18  
19 26 score and amount of intentional weight loss and duration of OCA use was applied  
20  
21 only in the data of active rowers. The retired were excluded because their weight loss  
22  
23 data refers to the past whilst the EAT-26 data refers to their current DE attitudes.  
24  
25  
26  
27  
28  
29  
30

## 31 **Results**

32  
33  
34 The anthropometric characteristics, training and menstrual history details and OCA use  
35  
36 of the lightweight rowers is summarized in Table 1.  
37  
38  
39

40 *Table 1.* Anthropometric characteristics, training and menstrual history details and oral  
41  
42 contraceptive use of lightweight rowers  
43  
44  
45  
46  
47  
48  
49  
50  
51  
52  
53  
54  
55  
56  
57  
58  
59  
60

| Variable                                                                          | Active<br>N =12 | Retired<br>N=9 | Both<br>N=21            |
|-----------------------------------------------------------------------------------|-----------------|----------------|-------------------------|
| Age (yr)                                                                          | 26.6 ±2.0       | 31.6 ±5.0      | 28.7 ±4.3 (23-39)*      |
| Stature (cm)                                                                      | 171.8 ±5.5      | 165.7±2.8      | 169.2±5.4 (162.0-179.5) |
| Body mass (kg)                                                                    | 61.2±1.8        | 61.5±5.4       | 61.3 ±3.7 (56.8-73)     |
| Body fat (%)                                                                      | 21.4±5.8        | 23.1±7.2       | 22.1 ±6.4 (11.6-35.1)   |
| BMI (kg.m <sup>-2</sup> )                                                         | 20.8±1.1        | 22.3 ±2.6      | 21.4±2.0 (19.5-27.8)    |
| Age at onset of exercising (yr)                                                   | 15.1±5.7        | 11.3 ±4.6      | 13.5 ±5.6 (4-26)        |
| Years playing sports                                                              | 11.5±5.2        | 20.2 ±5.0      | 15.2 ±6.7 (2-31)*       |
| Years training at lightweight category                                            | 2.5 ±1.1        | 6.0 ±3.8       | 4.0 ±3.1 (1-12)*        |
| Training per week (h)†                                                            | 15.3 ±4.1       | 22.9 ±12       | 18.6 ±9.0 (10-53)       |
| Strength and power training per week (h)†                                         | 1.7 ±1.6        | 3.3 ±2.6       | 2.4 ±2.2 (0-10)         |
| Water rower training per week (h)†                                                | 8.8 ±2.8        | 11.1 ±2.7      | 9.8 ±3.0 (5-16)         |
| Cardiovascular training (i.e., cycling, running, ergometer rowing ) per week (h)† | 4.8 ±2.2        | 8.6 ±9.8       | 6.4 ±6.7 (1-33.5)       |
| Age at onset of retirement (yr)                                                   | NA              | 28.6±5.6       | NA                      |
| Years since retirement                                                            | NA              | 3.0 ±1.9       | NA                      |
| OCA (yr)                                                                          | 4.3±3.1         | 2.4±1.4        | 3.9 ±2.7 (1-9)          |
| Years with oligo/amenorrhea                                                       | 4.5 ±3.9        | 4.2 ±4.4       | 4.4±4.0 (0-13)          |
| Menarcheal age (yr)                                                               | 13.4 ±1.1       | 13.0 ±1.2      | 13.2±1.1 (11-15)        |
| Oligo/amenorrhic (N)                                                              | 10              | 7              | 17                      |
| Gynaecological age (yr)                                                           | 13.2±2.2        | 18.5±5.1       | 15.5±4.5 (10-27)*       |
| Total lifetime menses (yr)                                                        | 10.8±2.3        | 14.6±5.4       | 12.4±4.3 (4.9-25.3)     |

1  
2  
3 Values are mean  $\pm$  SD. \* $P < 0.05$  between active and retired rowers; † at highest  
4  
5 competitive level; gynecological age is years since menarche; OCA is length of oral  
6  
7 contraceptive use in years; all oligo/amenorrhea years were secondary (occurred after  
8  
9 menarche).  
10

### 11 12 13 14 **Bone Mineral Density**

15  
16 Three participants had low BMD at LS (Z-scores -1.5, -1.2 and -1.1), one at FN (Z-score  
17  
18 -1.1) and eight at radius. Three of these had Z-scores below -2 at radius (Z-scores -2.3, -  
19  
20 2.1 and -2.3). As depicted in Figure 1, the mean Z-scores of the oligo/amenorrheic,  
21  
22 active and retired rowers was significantly lower at LS (AD=1.75,  $F(2,21) = 11.455$ ,  $P$   
23  
24  $< 0.01$ ,  $\eta^2 = 0.560$ ) compared to the eumenorrheic rowers. Total lifetime menses  
25  
26  $< 0.01$ ,  $\eta^2 = 0.560$ ) compared to the eumenorrheic rowers. Total lifetime menses  
27  
28 (controlled for BMI values) was positively associated with Z-scores at LS ( $r = 0.516$ ,  
29  
30  $P < 0.05$ ) and at FN ( $r = 0.438$ ,  $P < 0.05$ ).  
31  
32

33  
34  
35 Furthermore, when the retired were looked at separately, the results revealed that the  
36  
37 oligo/amenorrheic rowers had significantly lower Z-scores at LS (AD=2.7,  $F(2,9) =$   
38  
39  $17.307$ ,  $P < 0.01$ ,  $\eta^2 = 0.852$ ) and total body (AD=1.47,  $F(2,9) = 26.756$ ,  $P < 0.01$ ,  
40  
41  $\eta^2 = 0.899$ ) compared to the eumenorrheic retired rowers. Mean Z-scores of  
42  
43 eumenorrheic retired were above normal at all sites.  
44  
45  
46  
47  
48

### 49 **Disordered Eating, Pathogenic Weight Control Strategies**

50  
51 All active rowers reported engagement in intentional weight loss to qualify for  
52  
53 lightweight racing. Both active and retired rowers reported DE attitudes (EAT-26 score  
54  
55  $> 20$ ) and pathogenic weight control strategies (Table 2).  
56  
57  
58  
59  
60

Independent sample T-tests showed that active rowers with DE symptoms, had started rowing at a significantly younger age ( $10.6 \pm 3.1$ yr) than those without DE ( $18.3 \pm 4.9$ yr), ( $t=-3.088$ ,  $P<0.05$ ). The EAT-26 score was associated with the amount of intentional weight loss ( $r=0.720$ ,  $P<0.05$ ), see Figure 2, and duration of OCA use ( $r=0.908$ ,  $P<0.001$ ).

Table 2. Reported eating attitudes in lightweight rowers

|                                                | Active<br>N =12        | Retired<br>N=9         | Overall<br>N=21       |
|------------------------------------------------|------------------------|------------------------|-----------------------|
| DE symptoms N (%)                              | 5 42                   | 1 11                   | 6 29                  |
| Binge eating episodes N (%)                    | 8 67*                  | 0*≠                    | 8 38                  |
| Induced vomiting N (%)                         | 3 25*                  | 0*≠                    | 3 14                  |
| Use of laxatives N (%)                         | 4 33*                  | 0*<br>2 22≠            | 6 29                  |
| Intentional weight loss N<br>(%)(Mean loss SD) | 12 100<br>(5.8 ±1.9kg) | 8 89<br>(6.3 ±4.5kg) † | 20 95<br>(6.0 ±3.2kg) |

\*within the last 6 months; ≠past reported symptoms during their rowing career; †past intentional weight loss to qualify for racing lightweight during their rowing career

### Rib Pain

Seven participants (32%) reported a history of rib pain lasting between 2 to 10 weeks.

As depicted in Figure 3, the Z-scores at total body and LS were significantly lower ( $P<0.05$ ) in rowers with history of rib pain compared to those without. Additionally,

rowers with rib pain reported to train more hours per week, (21 vs. 17h,  $P>0.05$ ), and to have higher oligo/amenorrhea years (8.8 vs. 4yr,  $P>0.05$ ) than those without.

There is no additional data available.

## Discussion

This study confirms the co-existence of reduced BMD, oligo/amenorrhea, disordered eating and intentional weight loss, in UK elite female lightweight rowers. The association between total lifetime menses and BMD supports the notion that BMD declines as the number of missed menstrual cycles accumulates [32].

A novel, but concerning finding in this study was that total EAT-26 score was associated with the amount of intentional weight loss in active rowers which suggests that intentional weight loss increases the likelihood of engaging in DE behaviours. Furthermore, active rowers with DE symptoms, had started rowing at a significantly younger age ( $10.6 \pm 3.1$  yr) than those without DE ( $18.3 \pm 4.9$  yr), which suggests involvement in high level training at a young and vulnerable age (all rowers achieved national and international level) is significantly associated with risk to DE attitudes [37]. A meta-analysis of 34 studies (2459 athletes) supports these findings, which showed an increased risk of DE in elite athletes compared to non-elite [38]. Additionally, a higher prevalence of eating disorders among adolescent elite athletes than controls has been reported in a most recent study by Martinsen and Sundgot-Borgen, [39]. Binge eating was also a common finding among the active rowers (67%), which compares to 52% encountered by Thiel et al. [40]. Pathogenic weight control strategies and symptoms of DE and binge eating were more prevalent in the active than the retired rowers of this study, and in earlier studies on elite rowers [24, 25].

Furthermore, only 2/12 (17%) active compared to 4/9 (44%) retired reported to have received professional nutritional support for rowing and weight management. The importance of nutritional guidance to help in the prevention and treatment of DE has

1  
2  
3  
4  
5  
6  
7  
8  
9  
10  
11  
12  
13  
14  
15  
16  
17  
18  
19  
20  
21  
22  
23  
24  
25  
26  
27  
28  
29  
30  
31  
32  
33  
34  
35  
36  
37  
38  
39  
40  
41  
42  
43  
44  
45  
46  
47  
48  
49  
50  
51  
52  
53  
54  
55  
56  
57  
58  
59  
60

been evident to this study and is in agreement with Beals and Manore, [41] who stated that one of the issues that leads athletes to fail to meet their exercise energy requirements is lack of appropriate nutritional knowledge. Sundgot-Burgen and Klunland,[42], reported that the prevalence of DE was reduced from 33% to 15% in cross-country skiers over an 8-year DE preventative programme. Therefore, quality nutritional guidance should be offered from a young age to possibly minimize DE and the health related risks [4, 16, 43]. Youth rowing coach education on DE and Triad risk or perhaps even weight category rule change consideration may also needed to prevent DE, the Triad and associated unhealthy conditions in developing lightweight female rowers.

Weight loss is predominantly the result of negative energy balance, however, methods of intentional weight loss such as the use of laxatives, which was reported in this study, or other dehydration methods do not necessarily mean low energy availability [44] or a symptom of DE. In this study no association was found between symptoms of DE and BMD, which is contrary to previous studies [4, 16]. However, these studies determined energy deficiency, and assessed DE with the Eating Disorder Inventory instead. Possibly, DE is not necessarily a component of the Triad whereas low energy availability is [5]. Assessment of DE is also an important medical consideration, and can help identify psychopathological individuals with the Triad, in addition to indirectly establishing the possibility of low energy availability.

Prevalence of DE in lightweight rowers, as assessed by a score  $\geq 20$  on the EAT-26 questionnaire, has been reported to be between 12 and 16% [24, 25] compared to 29% in this study. These results suggest that the rowers from the above research studies and the



1  
2  
3 present study are considered “at risk” for clinical eating disorders [45]. This percentage  
4  
5 could have been even higher as athletes tend to under report symptoms of DE [20, 26]  
6  
7 due to denial and secrecy which are hallmarks of DE [22], and because do not consider  
8  
9 eating habits as DE, but as “part of the game” in season. Denying DE symptoms has  
10  
11 clinical implications for these athletes including delayed facilitation of appropriate  
12  
13 therapy. Furthermore, the validity of self-reported questionnaires has been critiqued on  
14  
15 the credibility of honest responses. Therefore, the use of questionnaires alone to assess  
16  
17 symptoms of DE would be best if complimented with a clinical interview in future  
18  
19 studies.  
20  
21  
22  
23

24  
25  
26 In ballet dancers and runners, the reproductive hormonal changes caused by excessive  
27  
28 exercise and low energy availability may result in low BMD at LS [16, 46]. The  
29  
30 mechanical stresses of rowing appear to exert protection on the lumbar BMD [47]. The  
31  
32 eumenorrheic rowers in this study demonstrated elevated BMD measurements compared  
33  
34 to their age and sex-matched reference data, particularly at LS, which is in accord with  
35  
36 Wolman et al. [48]. However, the mean lumbar BMD of the oligo/amenorrheic rowers  
37  
38 in this study was not elevated compared to their age and sex-matched reference data,  
39  
40 suggesting that oligo/amenorrhea has a negative effect on BMD [32]. This can be further  
41  
42 supported by the significantly lower Z-score observed at LS in the rowers with history  
43  
44 of oligo/amenorrhea compared to those without, and the positive association between  
45  
46 total lifetime menses and Z-scores at LS and FN found in this study. Previous studies  
47  
48 have shown similar findings [4, 46].  
49  
50  
51  
52  
53  
54  
55  
56  
57  
58  
59  
60

1  
2  
3 In line with the practices of coaches working with rowers in Great Britain [49], the  
4  
5 rowers in this study engaged in strength and power training, predominately consisting of  
6  
7 squats, cleans and lower-body plyometrics. The nature of the sport, and the direction of  
8  
9 force application, dictates that these pulling movements and closed chain exercises are  
10  
11 indeed rational and explains their routine recommendation [50]. Specifically, Ebben [51]  
12  
13 reported that an 8-week strength and power programme using these, improved time,  
14  
15 power and power per stroke during 2000m ergometer rowing. Unsurprisingly, pushing  
16  
17 based strength exercises for the upper-body, such as the bench press, rank quite low on  
18  
19 importance, and upper-body plyometrics generally do not feature [49]. From a training  
20  
21 specificity and performance-based point of view, the reasons for this appear sound.  
22  
23  
24 However, of a bone health perspective, such a focused approach may be contested. The  
25  
26 results of this study and that of others [17, 52] have reported low BMD in the radius of  
27  
28 athletes, suggesting that current training paradigms may not address this appropriately  
29  
30 and perhaps fitness coaches should also address the current and future health of their  
31  
32 athletes. At times, this will require a non-sport specific approach.  
33  
34  
35  
36  
37  
38  
39

40 Furthermore, to support bone health, general health, injury prevention and sporting  
41  
42 performance, current training paradigms should be supported with effective nutritional  
43  
44 guidance and psychological support, when required, to educate, prevent, recognise,  
45  
46 support and manage weight loss and DE in lightweight female rowers [53].  
47  
48  
49  
50

51  
52 Specifically, in this study eight rowers had low BMD at the radius ( $Z < -1$ ) and it has  
53  
54 been recommended that a Z-score of  $< -1.0$  in an athlete warrants further clinical  
55  
56 investigation and management, even in the absence of prior fracture [5]. The marked  
57  
58  
59  
60

1  
2  
3 incidence of low BMD at radius might suggest that the stress applied on the upper limb  
4  
5 skeleton through joint-reaction forces, generated during the rowing and/or the strength  
6  
7 and power training undertaken by the rowers in this study were not sufficient to elicit an  
8  
9 increase in BMD or maintain it to normal physiological levels [54]. It might also suggest  
10  
11 that these tensile forces were insufficient to counteract the negative effects of low  
12  
13 energy availability on BMD [3-5, 11] possibly induced by intentional weight loss  
14  
15 methods, a common practice in lightweight rowers as seen here and in previous research  
16  
17 [1, 36]. Furthermore, low radius BMD might reflect the dissipation/diversion of BMD to  
18  
19 weight-bearing sites, at the expense of non-weight bearing sites, such as the radius [52].  
20  
21 These findings reinforce the tenet that bone mineral acquisition obeys a principle of  
22  
23 specificity [52, 55] and that the effects of joint reaction forces on bone formation are not  
24  
25 as effective as those observed through ground reaction forces generated during dynamic  
26  
27 sports and /or activities like running, jumping, kicking, tennis, punching and plyometrics  
28  
29 which can incorporate multidimensional (non-conventional) high peak loading  
30  
31 compressing strains distribution into the bone [54-56].  
32  
33  
34  
35  
36  
37  
38  
39

40 In summary, exercises that directly target the arms such as the bench press and  
41  
42 plyometric push-ups for example, may help in the modelling/remodeling of the bone.  
43  
44 This comes into contrast with the sport-specificity theorem and the authors of this study  
45  
46 strongly recommend the implementation of supplemental non-sport specific exercises in  
47  
48 the training programmes of rowers and other athletes, that particularly suffer from low  
49  
50 radius BMD, could be a promising means of maximizing bone accrual and health, and  
51  
52 possibly reducing the incidence of skeletal fractures later in life. This is the first study  
53  
54 that contrasts with the sport-specificity theorem.  
55  
56  
57  
58  
59  
60

1  
2  
3  
4  
5 Little is known about the long-term effects of DE and oligo/amenorrhea on BMD. In  
6  
7 retired rowers with a history of oligo/amenorrhea, despite resuming normal menses,  
8  
9 their Z-scores at LS and total body were significantly lower than those who had always  
10  
11 been eumenorrheic. This corroborates existing body of knowledge, which suggests that  
12  
13 deficits in BMD may be irreversible [13, 32, 33]. Longitudinal study on a higher number  
14  
15 of female lightweight rowers is required to understand this issue more adequately.  
16  
17  
18  
19

20  
21 An incidence of rib stress fractures in male rowers of up to 12% has been reported [29].  
22  
23 Seven (32%) of participants in this study had history of rib pain lasting 2-8wk (5.1  
24  
25  $\pm 2.9$ wk). Whilst these participants had no radiographic evidence to confirm diagnosis of  
26  
27 rib stress fracture, our study suggests the incidence of rib pain is a common complaint in  
28  
29 female lightweight rowers (2.7 times more common than male rowers) and chronic chest  
30  
31 wall pain in rowers is almost always the result of rib stress fractures as suggested by  
32  
33 Strayer [57]. However, a subsequent study reported that athletes tend to self-report a  
34  
35 higher percentage on stress fractures (14.0%) compared to those diagnosed with stress  
36  
37 fractures (8.1%) ( $P < 0.001$ ), indicating that self-reporting of stress fractures has low  
38  
39 validity [58]. Due to the retrospective nature of this study in terms of assessing rib stress  
40  
41 fractures incidence, it was not possible to make a clinical diagnosis. In this study active  
42  
43 and retired rowers with history of rib pain had significantly lower LS and total body Z-  
44  
45 score values than those without history, which possibly suggests that low BMD may  
46  
47 play a role in the aetiology of exercise-induced rib stress fractures in female lightweight  
48  
49 rowers. Interestingly, Nevill et al. [52] reported significant correlations ( $P < 0.05$ )  
50  
51 between BMD recorded at ribs, thoracic and lumbar spine, pelvis, legs, hip and arms.  
52  
53  
54  
55  
56  
57  
58  
59  
60

1  
2  
3 This study's results are in agreement with others [19, 29, 30], although the association  
4  
5 between low BMD and fractures has been established in postmenopausal women with  
6  
7 osteoporosis [59] and not in premenopausal.  
8

9  
10 Generalisations for elite female lightweight rowers are limited by the small sample size,  
11  
12 however, lightweight rowing is a "minority" sport reflected by the relatively small  
13  
14 number (79) of female lightweight rowers identified to participate in National level  
15  
16 competition during the study year. Therefore, further research that recruits a larger  
17  
18 sample of lightweights and a control group of either non-athletes, athletes from other  
19  
20 sports, or non-lightweight rowers is recommended to further substantiate the findings of  
21  
22 this study. However, future research should focus on measuring energy input versus  
23  
24 energy output and assess in more detail, calcium, anti-inflammatory medications,  
25  
26 vitamin A and D supplemental intake and the methods and behaviours associated with  
27  
28 IWL. The establishment of normal BMD reference ranges in athletes is needed since the  
29  
30 application of a reference range based on the general non-athletic population may not be  
31  
32 appropriate [17]. Finally, the effect of upper body resistance and plyometrics training on  
33  
34 BMD should be investigated to determine if this could counter the negative effects of  
35  
36 DE and oligo/amenorrhea.  
37  
38  
39  
40  
41  
42  
43  
44

45 This study suggests that lightweight rowing rules may be partly responsible for resultant  
46  
47 high levels of DE, high rates of oligo/amenorrhea, BMD deficiencies which are  
48  
49 correlated with number of lifetime menses, and the tendency to have DE after  
50  
51 retirement. Apparent DE vulnerability of lightweight female rowers commencing  
52  
53 training at a younger age is of great concern. Lightweight female rowing rules mean that  
54  
55 any athlete above the height of 175cm meeting the mean target weight of 57kg would be  
56  
57  
58  
59  
60

1  
2  
3 underweight with a BMI of <18.5. We would therefore encourage lightweight rowing to  
4  
5 embrace sports injury prevention and provide coaches and athletes with appropriate  
6  
7 multidisciplinary nutritional and psychological support to prevent DE and the  
8  
9 development of the Triad, and perhaps to also consider changing the weight rules to  
10  
11 discourage unhealthy weight loss practices. Previous research suggests that rowing  
12  
13 performance is strongly correlated to body height (related to arm and leg length), as well  
14  
15 as body mass [60, 61, 62, 63]. Our study would therefore support competitive categories  
16  
17 being explored by height, rather than weight to help avoid detrimental health and  
18  
19 performance issues identified in our study related to DE and the Triad.  
20  
21  
22  
23  
24  
25

#### 26 **Contributorship statement:**

27  
28 LD, AR and RL-S conceived the idea for the study and prepared the methods. LD  
29  
30 completed the scanning and analysed it. LD, AR and RL-S collected the data and  
31  
32 analysed it. LD, AR and RL-S drafted the initial paper and RW, AT, LH and NJ  
33  
34 contributed with further critical drafting. All authors critically revised and approved the  
35  
36 final version of the manuscript.  
37  
38  
39  
40  
41  
42

43 **Funding:** No funding.  
44  
45

#### 46 **What are the new findings**

- 47  
48
- 49 • This study confirms the co-existence of reduced BMD, oligo/amenorrhea,  
50  
51 disordered eating and intentional weight loss, in UK elite female lightweight  
52  
53 rowers.  
54  
55
- 56  
57  
58  
59  
60

- EAT-26 scores were associated with the amount of intentional weight loss, which suggests that intentional weight loss increases the likelihood of engaging in DE behaviours in active rowers.
- Active rowers with DE symptoms, had started rowing at a significantly younger age ( $10.6 \pm 3.1$ yr) than those without DE ( $18.3 \pm 4.9$ yr), which suggests involvement in high level training at a young and vulnerable age (all rowers achieved national and international level) is significantly associated with risk to DE attitudes.
- Only 2/12 (17%) active compared to 4/9 (44%) retired reported to have received professional nutritional support for rowing and weight management.

#### **How might it impact on clinical practice in the near future**

- Individuals considering rowing in a lightweight category may benefit from assessment and monitoring for physical and psychological health risk and their suitability and sport participation safety by a trained sports medicine physician/scientist.
- If considered that they can safely achieve the required weight loss then they should be supported with nutritional guidance and regular monitoring of energy availability, DE and assessment of menstrual function.
- Athletes and coaches should be educated about the risks of DE, low energy availability and menstrual dysfunction on systemic health to help in the prevention and treatment of the Triad in lightweight rowers.
- Nutritional guidance and psychological support should be offered at a young age

1  
2  
3 to minimize DE and health related risks, and supplemental strength and  
4  
5 conditioning training that involves non-sport specific exercises that distribute  
6  
7 multidimensional high peak strains on the upper body skeleton is likely to elicit  
8  
9 bone health and performance benefits for female lightweight rowers.  
10  
11  
12  
13  
14  
15  
16  
17

### 18 **References**

- 19 1 Rumball JS, Lebrun CM, De Ciacca SR, et al. Rowing Injuries. *Sports Med*  
20  
21 2005;**35**:537-55.  
22  
23  
24  
25  
26 2 Slater GJ, Rice AJ, Jujika I, et al. Physique traits of lightweight rowers and their  
27  
28 relationship to competitive success. *Brit J Sports Med* 2005;**39**:736-41.  
29  
30  
31  
32  
33 3 Talbott SM, Shapses SA. Fasting and energy intake influence bone turnover in  
34  
35 lightweight male rowers. *Int J Sport Nut* 1998;**8**:377-87.  
36  
37  
38  
39  
40 4 Zanker CL, Swaine IL. Relation between bone turnover, oestradiol, and energy  
41  
42 balance in women distance runners. *Brit J Sports Med* 1998;**32**:167-71.  
43  
44  
45  
46  
47 5 Nattiv A, Loucks AB, Manore MM, et al. American College of Sports Medicine  
48  
49 position stand: The female athlete triad. *Med Sci Sports Exerc* 2007;**39**:1867-82.  
50  
51  
52  
53  
54 6 Burr DB, Milgrom C. *Musculoskeletal Fatigue and Stress Fractures*. Boca Raton:  
55  
56 CRC Press 2001.  
57  
58  
59  
60



1  
2  
3  
4  
5 7 Hoch AZ, Papanek P, Szabo A, et al. Association between the female athlete triad and  
6  
7  
8  
9  
10  
11  
12  
13  
14  
15  
16  
17  
18  
19  
20  
21  
22  
23  
24  
25  
26  
27  
28  
29  
30  
31  
32  
33  
34  
35  
36  
37  
38  
39  
40  
41  
42  
43  
44  
45  
46  
47  
48  
49  
50  
51  
52  
53  
54  
55  
56  
57  
58  
59  
60  
endothelial dysfunction in dancers. *Clin J Sport Med* 2011;**21**:119-25.

8 Flier JS. Clinical review 94: What's in a name? In search of leptin's physiologic role.  
*J Clin Endocrinol Metab* 1998;**83**:1407-13.

9 Zanker CL, Swaine IL. Responses of bone turnover markers to repeated endurance  
running in humans under conditions of energy balance or energy restriction. *Eur J Appl  
Physiol* 2000;**83**:434-40.

10 Eriksen EF, Colvard DS, Berg NJ, et al. Evidence of oestrogen receptors in normal  
human osteoblasts. *Science* 1988;**241**:84-6.

11 Ihle R, Louks AB. Dose-response relationships between energy availability and bone  
turnover in young exercising women. *J Bone Miner Res* 2004;**19**:1231-40.

12 Joy EA, Campbell D. Stress fractures in the female athlete. *Curr Sports Med Rep*  
2005;**4**:323-8.

13 Warren MP, Brooks-Gunn J, Fox RP, et al. Osteopenia in exercise-associated  
amenorrhea using ballet dancers as a model: A longitudinal study. *J Clin Endocrinol  
Metab* 2002;**87**:3162-8.

1  
2  
3 14 Hoch AZ, Papanek P, Havlik HS, et al. Prevalence of the female athlete triad/tetrad  
4  
5 in professional ballet dancers. *Med Sci Sports Exerc* 2009;**41**:524.  
6

7  
8  
9  
10 15 Hoch Z, Stavrakos EJ, Schimke FJ. Prevalence of female athlete triad characteristics  
11  
12 in a club triathlon team. *Arch Phys Med Rehabil* 2007;**88**:681-2.  
13

14  
15  
16  
17 16 Cobb KL, Bachrach LK, Greendale G, et al. Disordered eating, menstrual irregularity  
18  
19 and bone mineral density in female runners. *Med Sci Sports Exerc* 2003;**35**:711-9.  
20

21  
22  
23  
24 17 Pollock P, Grogan C, Perry M, et al. Bone-mineral density and other features of the  
25  
26 female athlete triad in elite endurance runners: A longitudinal and cross-sectional  
27  
28 observational study. *Int J Sport Nut Exerc Metab* 2010;**20**:418-26.  
29

30  
31  
32  
33 18 Schtscherbyna A, Soares EA, de Oliveira FP, et al. Female athlete triad in elite  
34  
35 swimmers of the city of Rio de Janeiro, Brazil. *Nutrition* 2009;**25**:634-9.  
36

37  
38  
39  
40 19 Warden SJ, Gutschlag FR, Wajswelner H, et al. Aetiology of rib stress fractures in  
41  
42 rowers. *Sports Med* 2002;**32**:819-36.  
43

44  
45  
46  
47 20 Nattiv A, Agostini R, Drinkwater B, et al. The female athlete triad: The inter-  
48  
49 relatedness of disordered eating, amenorrhea, and osteoporosis. *Clin Sports Med*  
50  
51 1994;**13**:405-18.  
52  
53  
54  
55  
56  
57  
58  
59  
60

1  
2  
3 21 Sundgot-Borgen J, Torstveit MK. Prevalence of eating disorders in elite athletes is  
4  
5 higher than in the general population. *Clin J Sport Med* 2004;**14**:25-32.  
6

7  
8  
9  
10 22 Currie A, Morse ED. Eating disorders in athletes: managing the risks. *Clin Sports*  
11  
12 *Med* 2005;**24**:871-83.  
13

14  
15  
16  
17 23 Byrne S, McClean N. Elite athletes: effects of the pressure to be thin. *J Sci Med Sport*  
18  
19 2002;**5**:80-94.  
20

21  
22  
23  
24 24 Terry PC, Lane AM, Warren L. Eating attitudes, body shape perceptions and mood  
25  
26 of elite rowers. *J Sci Med Sport* 1999;**2**:67-77.  
27

28  
29  
30  
31 25 Terry PC, Waite J. Eating attitudes and body shape perceptions among elite rowers:  
32  
33 effects of age, gender and weight category. *Aust J Sci Med Sport* 1996;**28**:3-6.  
34  
35

36  
37  
38 26 Sundgot-Borgen J. Prevalence of eating disorders in elite female athletes. *Int J Sport*  
39  
40 *Nutr* 1993;**3**:29-40.  
41

42  
43  
44  
45 27 Rauh MJ, Nichols JF, Barrack MT. Relationships among injury and disordered  
46  
47 eating, menstrual dysfunction, and low bone mineral density in high school athletes: a  
48  
49 prospective study. *J Athl Train* 2010;**45**:243-52.  
50

51  
52  
53  
54 28 Beck TJ, Ruff CB, Shaffer RA, et al. Stress fracture in military recruits: gender  
55  
56 differences in muscle and bone susceptibility factors. *Bone* 2000;**27**:437-44.  
57  
58  
59  
60

1  
2  
3  
4  
5 29 Vinther A, Kanstrup IL, Christiansen E, et al. Exercise-induced rib stress fractures:  
6  
7 influence of reduced bone mineral density. *Scand J Med Sci Sports* 2005;**15**:95-9.  
8  
9

10  
11  
12 30 Hickey GJ, Fricker PA, McDonald WA. Injuries to elite rowers over a 10-year  
13  
14 period. *Med Sci Sports Exerc* 1997;**29**:1567-72.  
15  
16

17  
18  
19 31 Budget R, Hettinga DM, Steinacker J. Sports Medicine. In: Secher NH, Volianitis S.  
20  
21 eds. *Rowing*. London: Blackwell 2007:124-140.  
22  
23

24  
25  
26 32 Keen AD, Drinkwater BL. Irreversible bone loss in former amenorrheic athletes.  
27  
28 *Osteoporosis Int* 1997;**7**:311-5.  
29  
30

31  
32  
33 33 Barrack MT, Van Loan MD, Rauh MJ, et al. Body mass, training, menses, and bone  
34  
35 in adolescent runners: a 3-yr follow-up. *Med Sci Sports Exerc* 2011;**43**:959-66.  
36  
37

38  
39  
40 34 Garner DM, Olmsted MP, Bohr Y, et al. The eating attitudes test: psychometric  
41  
42 features and clinical correlates. *Psychol Med* 1982;**12**:871-8.  
43  
44

45  
46  
47 35 American Psychiatric Association, eds. *Diagnostic and statistical manual of mental*  
48  
49 *disorders: DSM-IV-TR*®. Washington DC: American Psychiatric Association 2000.  
50  
51

1  
2  
3 36 Karlson KA, Becker CB, Merkur A. Prevalence of eating disordered behaviour in  
4  
5 collegiate lightweight women rowers and distance runners. *Clin J Sports Med*  
6  
7 2001;**11**:32-7.  
8  
9

10  
11  
12 37 Sundgot-Borgen J. Risk and trigger factors for the development of eating disorders in  
13  
14 female elite athletes. *Med Sci Sports Exerc* 1994;**26**:414-9.  
15  
16

17  
18  
19 38 Smolak L, Murnen SK, Ruble AE. Female athletes and eating problems: a meta-  
20  
21 analysis. *Int J Eating Disord* 2000;**27**:371-80.  
22  
23

24  
25  
26 39 Martinsen M, Sundgot-Borgen J. Higher prevalence of eating disorders among  
27  
28 adolescent elite athletes than controls. *Med Sci Sports Exerc* 2013;**45**:1188-97.  
29  
30

31  
32  
33 40 Thiel A, Gottfried H, Hesse FW. Subclinical eating disorders in male athletes: a  
34  
35 study of the low weight category in rowers and wrestlers. *Acta Psychiatr Scand*  
36  
37 1993;**88**:259-65.  
38  
39

40  
41  
42 41 Beals KA, Manore MM. Behavioral, psychological, and physical characteristics of  
43  
44 female athletes with subclinical eating disorders. *Int J Sport Nutr Exerc Metab*  
45  
46 2000;**10**:128-43.  
47  
48

49  
50  
51  
52 42 Sundgot-Borgen J, Klungland M. The female athlete triad and the effect of  
53  
54 preventative work. *Med Sci Sports Exerc* 1998;**30**:S181.  
55  
56  
57  
58  
59  
60

1  
2  
3 43 Emery CA, Hagel B, Morrongiello B. Injury prevention in child and adolescent sport:  
4  
5 whose responsibility is it? *Clin J Sport Med* 2006;**6**:514-21.  
6  
7

8  
9  
10 44 Carney CP, Andersen AE. Eating disorders. Guide to medical evaluation and  
11  
12 complications. *Psychiatr Clin North Am* 1996;**19**:657-79.  
13

14  
15  
16 45 Smock AJ, Hughes JM, Popp KL, et al. Bone volumetric density, geometry and  
17  
18 strength in female and male collegiate runners. *Med Sci Sports Exerc* 2009;**41**:2026-32.  
19  
20  
21

22  
23  
24 46 Drinkwater BL, Nilson K, Chesnut CH 3rd, et al. Bone mineral content of  
25  
26 amenorrheic and eumenorrheic athletes. *N Engl J Med* 1984;**2**:277-81.  
27  
28

29  
30  
31 47 Lariviere JA, Robinson TL, Snow CM. Spine bone mineral density increases in  
32  
33 experienced but not novice collegiate female rowers. *Med Sci Sports Exerc*  
34  
35 2003;**35**:1740-4.  
36  
37

38  
39  
40 48 Wolman RL, Clark P, McNally E, et al. Menstrual state and exercise as determinants  
41  
42 of spinal trabecular bone density in female athletes. *Brit Med Journal* 1990;**301**:516-8.  
43  
44

45  
46  
47 49 Gee TI, Olsen PD, Berger NJ, et al. Strength and conditioning practices in rowing. *J*  
48  
49 *Strength Cond Res* 2011;**25**:668-82.  
50  
51

52  
53  
54 50 Ivey P, Oakley J, Hagerman P. Strength training for the preparatory phase in  
55  
56 collegiate women's rowing. *Strength & Cond Journal* 2004;**26**:10-5.  
57  
58  
59  
60

1  
2  
3  
4  
5 51 Ebben WP, Kindler AG, Chirdon KA, et al. The effect of high-load vs. high-  
6 repetition training on endurance performance. *J Strength Cond Res* 2004;**18**:513-7.  
7

8  
9  
10  
11  
12 52 Nevill AM, Burrows M, Holder RL, et al. Does lower-body BMD develop at the  
13 expense of upper-body BMD in female runners? *Med Sci Sports Exerc* 2003;**35**:1733-9.  
14

15  
16  
17  
18  
19 53 [Manore MM](#). Dietary recommendations and athletic menstrual dysfunction.  
20 *Sports Med* 2002; **32**:887-901.  
21

22  
23  
24 54 Kohrt WM, Ehsani AA, Birge SJ Jr. Effects of exercise involving predominantly  
25 either joint-reaction or ground-reaction forces on bone mineral density in older women.  
26  
27  
28  
29 *J Bone Miner Res* 1997;**12**:1253–61.  
30

31  
32  
33 55 Sanchis-Moysi J, Dorado C, Olmedillas H, et al. Bone and lean mass inter-arm  
34 asymmetries in young male tennis players depend on training frequency. *Eur J Appl*  
35  
36  
37  
38  
39  
40  
41  
42  
43  
44  
45  
46  
47  
48  
49  
50  
51  
52  
53  
54  
55  
56  
57  
58  
59  
60  
*Physiol* 2010;**110**:83-90.

56 Platen P, Chae EH, Antz R, et al. Bone mineral density in top level male athletes of  
different sports. *Eur J Sport Sci* 2001;**1**:1-15.

57 Strayer LM. The myth of the intercostal muscle pull. *Am Rowing* 1990;**22**:42-4.

58 Øyen J, Torstveit MK, Sundgot-Borgen J. Self-reported versus diagnosed stress  
fractures in Norwegian female elite athletes. *J Sports Sci Med* 2009;**8**:130-5.

1  
2  
3  
4  
5 59 Melton LJ 3rd, Atkinson EJ, O'Fallon WM et al. Long-term fracture prediction by  
6  
7 bone mineral assessed at different skeletal sites. *J Bone Miner Res* 1993;**8**:1227-33.  
8  
9

10  
11  
12 60 Yoshiga CC, Higuchi M. Rowing performance of female and male rowers. *Scand J*  
13 *Med Sci Sports* 2003;**13**:317-321.  
14

15  
16 61 Barrett RS, Manning JM. Rowing: Relationships between rigging set-up,  
17 anthropometry, physical capacity, rowing kinematics and rowing performance. *Sports*  
18 *Biomec* 2004;**3**:221-235.  
19

20  
21 62 Huang, Chun-Jung, Thomas W. Nesser TW, et al. Strength and power determinants  
22 of rowing performance. *J Exerc Physiol Online* 2007;**10**:43-50.  
23

24  
25 63 Pavle M, Ružić L. Predicting the 1000m rowing ergometer performance in 12–13-  
26 year-old rowers: The basis for selection process?." *J Sci and Med in Sport*  
27 2008;**11**:218-226.  
28  
29  
30  
31  
32  
33  
34  
35  
36  
37  
38  
39  
40  
41  
42  
43  
44  
45  
46  
47  
48  
49  
50  
51  
52  
53  
54  
55  
56  
57  
58  
59  
60



1  
2  
3  
4  
5  
6  
7  
8 **Bone mineral density, rib pain and other features of the female athlete triad in elite**

9  
10 **lightweight rowers. ~~:- new concepts for injury prevention~~**

11  
12 Lygeri Dimitriou<sup>1</sup>, Richard Weiler<sup>2</sup>, Rebecca Lloyd-Smith<sup>3</sup>, Antony Turner<sup>1</sup>, Luke  
13  
14 Heath<sup>1</sup>, Nic James<sup>1</sup>, Anna Reid<sup>3</sup>

15  
16 <sup>1</sup>Middlesex University, London Sport Institute, London, United Kingdom,

17  
18 <sup>2</sup> University College London Hospitals NHS Foundation Trust, London, United  
19  
20 Kingdom

21  
22 <sup>3</sup> University College London, London, United Kingdom

23  
24 **Running Title:** The Triad in elite female lightweight rowers

25  
26 **Word count:** 4145 excluding abstract, and strengths and limitations.

27  
28 Lygeri Dimitriou: [l.dimitriou@mdx.ac.uk](mailto:l.dimitriou@mdx.ac.uk); Richard Weiler: [rweiler@doctors.org.uk](mailto:rweiler@doctors.org.uk);

29  
30 Rebecca Lloyd-Smith: [rlloydSmith@hotmail.com](mailto:rlloydSmith@hotmail.com); Antony Turner:

31  
32 [A.N.Turner@mdx.ac.uk](mailto:A.N.Turner@mdx.ac.uk); Luke Heath: [heath.luke@hotmail.co.uk](mailto:heath.luke@hotmail.co.uk); Nic James:

33  
34 [n.james@mdx.ac.uk](mailto:n.james@mdx.ac.uk); Anna Reid: [anna\\_reid@yahoo.com](mailto:anna_reid@yahoo.com);

35  
36 Address for correspondence: Lygeri Dimitriou, Middlesex University, London Sport

37  
38 Institute, The Burroughs, Hendon, London NW4 4BT, United Kingdom, Tel: +44(0)20

39  
40 8411 4354, Fax: +44(0)20 8411 4354, email: [l.dimitriou@mdx.ac.uk](mailto:l.dimitriou@mdx.ac.uk)

## The Triad in elite female lightweight rowers

### ABSTRACT

**Objective:** To determine bone mineral density (BMD) and the associations among BMD, menstrual history, disordered eating (DE), training history, intentional weight loss and rib pain for the first time in female lightweight rowers.

**Methods:** Dual-energy X-ray absorptiometry measured total body (TB) composition and BMD at the spine, femoral neck (FN), radius and TB. Questionnaires (EAT-26) measured DE, oligo/amenorrhea years, rib pain, training history and nutritional support provision in 21 elite female lightweight rowers (12 active, 9 retired).

**Results:** DE was reported in 6 of the rowers. The active with DE started rowing younger ( $P<0.05$ ) than those without, and their amount of intentional weight loss (IWL) was associated with EAT-26 score ( $P<0.05$ ). Some participants reported a history of oligo/amenorrhea 17 (76%) and/or rib pain 7 (32%) with those with rib pain having lower spine and TB Z-scores ( $P<0.05$ ) than those without. Those with oligo/amenorrhea had lower spine Z-scores ( $P<0.01$ ) than those without. Twelve participants had low BMD; three at spine; one at FN; and eight at radius. 13% of mean total training hours ( $18.6 \pm 9.1 \text{ h} \cdot \text{week}^{-1}$ ) were spent strength training ( $2.4 \pm 2.2 \text{ h} \cdot \text{week}^{-1}$ ). **Conclusions:** Upper-body exercises incorporating multidimensional high peak bone strain were not reported and may need to be considered in their strength training to improve radial BMD. Results suggest IWL and high-level training at a young age increases the likelihood of DE and there may be a lack of quality nutritional support for these athletes.

**Key words:** DXA, menstrual dysfunction, exercise, dieting, skeletal health, fractures

### Strengths and limitations of this study

- The first multidisciplinary study to investigate the distribution of BMD, compared to parameters established in healthy non-athletic women, in association to rib ~~stress~~ fractures in UK elite active and retired female lightweight rowers.
- The first multidisciplinary study that examined BMD and TB composition via DXA, menstrual history, disordered eating (DE), training history, intentional weight loss and rib pain in lightweight rowing which is a “minority” sport and understudied.
- ~~• The first study to suggest that lightweight rowing rules may be partly responsible for the development of the Triad, and perhaps changing the weight rules to discourage unhealthy weight loss practices could prevent injury.~~
- The first study that contrasts with the sport-specificity theorem and highlights the importance of supplemental non-sport specific exercises in the training programmes of rowers and other athletes, that particularly suffer from low radius BMD, to elicit bone health and possibly reduce the incidence of skeletal fractures later in life.
- Generalisations for elite female lightweight rowers are limited by the small sample size.
- The validity of self-reported questionnaires has been critiqued on the credibility of honest responses.

## Introduction

Rowing is an Olympic sport with two weight categories: open (no weight restriction) and lightweight. To qualify for racing lightweight, female rowers must weigh-in at no more than 59kg with a crew average of no more than 57kg (International Rowing Federation). The majority of lightweight rowers restrict their diet to meet weight restrictions using both acute and chronic methods of weight-loss [1, 2]. This could lead to disordered eating (DE), chronic energy deficiency, and subsequently menstrual dysfunction and low bone mineral density (BMD) [3, 4, 5]. The latter two are associated with bone stress injuries [6] and endothelial dysfunction, a concern for future cardiovascular risk [7]. The Female Athlete Triad (the Triad) according to the American College of Sports Medicine (ACSM) revised position statement; is an association between energy availability, menstrual function, and BMD, which may have clinical manifestations including eating disorders, amenorrhea, and osteoporosis [5]. Low energy availability, with or without disordered eating, can cause amenorrhea and reduced BMD due to reductions in leptin [8], insulin like growth factor (IGF-1) [9], and oestrogen production [10]. It has been reported that when severely restricted energy availability is prolonged, from either dietary restriction or increased expenditure, irreversible reductions in BMD could result [11]. Even less severe energy restrictions could suppress bone formation, and possibly prevent young women from achieving their genetic potential for peak BMD [11].

The Triad is also associated with increased incidence of musculoskeletal injuries and higher stress fracture risk [12] and is prevalent in sports where leanness is considered important [5]. The existence of the Triad is documented in dancers [13, 14], triathletes [15], distance runners [16, 17] and swimmers [18] but not in female lightweight rowers,

1  
2  
3  
4  
5  
6  
7  
8 who commonly have a higher risk for rib stress fractures [19], and where leanness and  
9 weight control determine eligibility to compete and participate in the sport.  
10  
11

12  
13  
14 Disordered eating may describe the array of abnormal and harmful sub-clinical eating  
15 attitudes used to lose weight or maintain low weight, and is thought to affect up to two-  
16 thirds of young female athletes [20]. Sundgot-Borgen and Torstveit's, [21] more recent  
17 and large study on 572 elite female athletes showed a 20% prevalence of eating  
18 disorders, indicating a significant clinical issue for the health of a great amount of  
19 athletes. Eating disorders have one of the highest mortality rates of mental illnesses [22],  
20 and have been reported to be more prevalent (31%) in elite female athletes involved in  
21 sports emphasising leanness compared to those athletes (8%) involved in sports with  
22 less emphasis on leanness [23]. Studies on rowing have shown that lightweights are at a  
23 higher eating disorder risk than heavyweights, as identified by the Eating Attitudes Test-  
24 26 (EAT-26), [24, 25]. This is in accord with the higher prevalence of DE in "weight-  
25 category" sports which was reported by Sundgot-Borgen's, [26] study on 522 elite  
26 female athletes from 35 sports and 448 nonathletic controls. An incidence of 12% [24]  
27 and 16.2% [25] of DE has been reported in lightweight rowers in the past. The  
28 interlinked nature between DE, menstrual dysfunction and BMD is demonstrated in  
29 studies that established a relationship between DE and menstrual dysfunction [4, 16],  
30 between menstrual dysfunction and low BMD [3, 27] and between DE and low BMD in  
31 the absence of menstrual dysfunction [4, 16, 27]. Low BMD is also linked with  
32 increased incidence of stress fractures in male and female Marine recruits [28] and with  
33 exercise-induced rib stress fractures in male lightweight rowers [29]. Although one of  
34 the most common injuries in female rowers is rib stress fractures, its aetiology remains  
35  
36  
37  
38  
39  
40  
41  
42  
43  
44  
45  
46  
47  
48  
49  
50  
51  
52  
53  
54  
55  
56  
57  
58  
59  
60

1  
2  
3  
4  
5  
6  
7  
8 unclear [19]. Rib stress fractures are less common in men [30], suggesting that low  
9  
10 oestrogen levels, low BMD or factors associated with the Triad might be causative for  
11  
12 rib stress fractures in female rowers.

13  
14  
15  
16 To date, no studies have investigated BMD in relation to rib stress fractures in female  
17  
18 lightweight rowers. This reinforces the view of [31], that the pathology and prevention  
19  
20 of rib stress fractures is a worthy area of research in rowing. Little is known about the  
21  
22 possible long-term implications of the Triad but it appears that the effects on BMD  
23  
24 might be partially irreversible [13, 32, 33].

25  
26  
27 The aims of the present study were therefore to investigate: 1) The distribution of BMD  
28  
29 for the first time in UK elite active and retired female lightweight rowers compared to  
30  
31 the parameters established in healthy non-athletic women; 2) the associations among  
32  
33 BMD, menstrual history, training history, DE, intentional weight loss and rib pain and  
34  
35 3) assess whether any past DE symptoms and menstrual dysfunction continue after  
36  
37 retirement.

## 38 39 40 **Methods**

### 41 42 **Ethics**

43  
44 This study was approved by the Health Studies Ethics Committee at Middlesex  
45  
46 University. This research received no specific grant from any funding agency in the  
47  
48 public, commercial or not-for-profit sectors. Details of the study's [aims](#), methods and  
49  
50 testing procedures were explained to each participant, before a written, informed  
51  
52 consent was obtained.

## Participants

Participants were recruited from responses to recruitment advertisements [for current and retired lightweight rowers offering free determination of BMD and TB composition](#) in rowing clubs and a rowing magazine. No mention of DE, menstrual disorders and other aspects of the Triad were included in the advert to avoid possible sample selection bias. The year of this study only 79 UK female lightweight rowers were identified to participate in national and international level competitions. Twenty-nine Caucasian female lightweight rowers, from 9 different clubs volunteered to participate in this study. Only 21 (12 active, 9 retired) met the study's criteria and volunteered for the study. Inclusion criteria were females aged over 18 years who had rowed competitively in lightweight category for no less than one year. Participants were excluded if they had a history of bone disease, used medications known to influence BMD (e.g., corticosteroids, antidepressants, thiazolidinediones, bisphosphonates, NSAIDs and chemotherapy) or if they were pregnant, lactating or post-menopausal. Two rowers were excluded and six withdraw for logistic reasons. Rowing competition level was: 5 international (2 active) and 16 national (10 active) level. All were non-smokers and their mean weekly alcohol consumption was  $5.8 \pm 1.2$  units per week. None reported vitamin D and calcium supplements intake and all but two did not regularly (3-4/week) eat products containing calcium.

## Questionnaires:

### EAT-26 and Pathogenic Weight Control Strategies

1  
2  
3  
4  
5  
6  
7  
8 Symptoms and characteristics of eating disorders were assessed by the EAT-26, a 26-  
9 item inventory with strong psychometric properties [34]. Thirteen items relate to  
10 “dieting” behaviour, six to “Bulimia and Food Preoccupation” and seven to “Oral  
11 Control”. The 26 items of the EAT-26 inventory were rated on a 6-point response scale  
12 as described in Garner et al. [34]. The score can range from 0-78. A score of 20 or above  
13 is considered indicative of DE [34].  
14

15  
16  
17  
18  
19 Self-reported questionnaires assessed whether participants had been engaged in any  
20 pathogenic weight control strategies such as vomiting and/or use of laxatives to induce  
21 weight loss within the last 6 months. Present or past engagement in binge-eating  
22 behaviour, eating more than other people would in the same situation [35] and whether  
23 they had previously been diagnosed with an eating disorder were also assessed. Retired  
24 rowers were assessed to observe whether any past pathogenic weight control strategies  
25 continued after retirement.  
26  
27  
28  
29  
30  
31  
32

### 33 34 35 **Menstrual History Questionnaire**

36 All rowers reported their age of menarche and number of menses for each year after  
37 menarche choosing from the following options: amenorrhea (0-3), oligomenorrhea (4-9)  
38 and eumenorrhea (10-13) [16]. Total lifetime menses (years) and number of years of  
39 amenorrhea, and oligomenorrhea was calculated as described in Cobb et al. [16] and  
40 normalised for age by dividing the number of years of each of the above menstrual  
41 variables with current age. Due to the small sample size, menstrual history status was  
42 categorised into two groups of oligo/amenorrheic (those with history of  
43 oligo/amenorrhea) and eumenorrheic (those without). Retired rowers were assessed to  
44 observe whether any history of oligo/amenorrhea continued after retirement.  
45  
46  
47  
48  
49  
50  
51  
52



### Additional Questionnaires

Self-reported questionnaires assessed demographic data, including details of sporting history, mode of training including type of resistance training exercises and average weekly training volume (hours) at highest competitive level for both retired and active rowers, level of competition, medical history, use of medications, supplements and oral contraceptives (OCA), smoking, alcohol intake and weight loss. Duration of OCA use was normalised for gynecological age by dividing the number of years of OCA use with gynecological age. History of injury was reported by drawing the area of symptoms on a body chart and answering questions about cause of injury, duration of symptoms, and diagnosis. History, duration and cause of rib pain were also recorded. Participants were also asked whether they had ever been provided with nutritional and/or weight management advice from coach/club. Retired rowers gave details of physical activity since retiring from lightweight rowing. Questionnaire details were verbally explained to each participant in conjunction with written instructions. Whilst participants were completing the questionnaires investigators were present to clarify any issues/questions and tried to ensure that the answers were as accurate as possible.

### Physical and Bone Measurements

Bone mineral density ( $\text{g}\cdot\text{cm}^{-2}$ ) at the posterior anterior (PA) L2-4 lumbar spine (LS); PA femoral neck (FN); dominant arm distal radius; total body and body composition (lean and fat mass) were measured by DXA (fan beam, Lunar DPX-L series GE Medical systems, Lunar Madison, WI USA). The in-house coefficient of variation of the BMD measurements ranged from 0.5-0-1.4%. The scanner was calibrated using a spine

phantom at the start of each day of testing and its performance was followed with the labs quality assurance protocol. Z-scores were calculated using the manufacturer-supplied reference data (Lunar enCORE© USA/European reference data) set to compare individuals BMD values to age and sex-matched controls. The ACSM defines the term 'low BMD' as a Z-score between -1 and -2, and 'osteoporosis' a Z-score  $\leq -2$  together with secondary risk factors for fracture (e.g., chronic malnutrition, eating disorders, hypoestrogenism, hypogonadism, glucocorticoid exposure, and previous fractures,[3]).

All participants were requested to refrain from heavy physical activity 24 h before screening to minimize the effect of fluctuations in hydration status on body composition measurements. Participants' height (m) and body mass (kg) were measured using standard stadiometers and balance beam scales, respectively. Body mass index (BMI) was calculated as kilograms per square meter ( $\text{kg}\cdot\text{m}^{-2}$ ). All anthropometric measurements, scanning and analyses were performed by the same technician using the same equipment.

### Statistical Analyses

Statistical analyses were performed using SPSS version 16.0. Values are reported as means  $\pm$  SD. Statistical significance was set at  $P < 0.05$ . Levene's test was used to assess equality of variances in the different groups. Violations of the equality of variances assumption were corrected using the P-value calculated for equal variances not assumed. A General Linear Model was used to determine whether Z-scores, years of training, age of menarche, and amount of intentional weight loss differ: 1) between rowers with and without history of oligo/amenorrhea or rib pain, and 2) between active rowers that

1  
2  
3  
4  
5  
6  
7  
8 scored  $\geq 20$  and active rowers that scored  $< 20$  on the EAT-26. When the Z-scores were  
9 analysed to assess for differences between participants, data was adjusted/controlled for  
10 BMI [36], by fitting an ANCOVA to the data.  
11  
12

13  
14  
15 Z-scores were used in the statistical analyses, as they are normative values for  
16 chronological age. Pearson's correlation coefficient was used to determine significant  
17 relationships between variables of interest. Any analysis performed between Z-scores  
18 and other specific variables was controlled for BMI. Correlation analysis between EAT-  
19 26 score and amount of intentional weight loss and duration of OCA use was applied  
20 only in the data of active rowers. The retired were excluded because their weight loss  
21 data refers to the past whilst the EAT-26 data refers to their current DE attitudes.  
22  
23  
24  
25  
26  
27  
28  
29  
30

### 31 **Results**

32  
33 The anthropometric characteristics, training and menstrual history details and OCA use  
34 of the lightweight rowers is summarized in Table 1.  
35  
36

37  
38 *Table 1.* Anthropometric characteristics, training and menstrual history details and oral  
39 contraceptive use of lightweight rowers  
40  
41  
42  
43  
44  
45  
46  
47  
48  
49  
50  
51  
52  
53  
54  
55  
56  
57  
58  
59  
60

| Variable                                                                         | Active<br>N =12 | Retired<br>N=9 | Both<br>N=21            |
|----------------------------------------------------------------------------------|-----------------|----------------|-------------------------|
| Age (yr)                                                                         | 26.6 ±2.0       | 31.6 ±5.0      | 28.7 ±4.3 (23-39)*      |
| Stature (cm)                                                                     | 171.8 ±5.5      | 165.7±2.8      | 169.2±5.4 (162.0-179.5) |
| Body mass (kg)                                                                   | 61.2±1.8        | 61.5±5.4       | 61.3 ±3.7 (56.8-73)     |
| Body fat (%)                                                                     | 21.4±5.8        | 23.1±7.2       | 22.1 ±6.4 (11.6-35.1)   |
| BMI (kg.m <sup>-2</sup> )                                                        | 20.8±1.1        | 22.3 ±2.6      | 21.4±2.0 (19.5-27.8)    |
| Age at onset of exercising (yr)                                                  | 15.1±5.7        | 11.3 ±4.6      | 13.5 ±5.6 (4-26)        |
| Years playing sports                                                             | 11.5±5.2        | 20.2 ±5.0      | 15.2 ±6.7 (2-31)*       |
| Years training at lightweight category                                           | 2.5 ±1.1        | 6.0 ±3.8       | 4.0 ±3.1 (1-12)*        |
| Training per week (h)†                                                           | 15.3 ±4.1       | 22.9 ±12       | 18.6 ±9.0 (10-53)       |
| Strength and power training per week (h)†                                        | 1.7 ±1.6        | 3.3 ±2.6       | 2.4 ±2.2 (0-10)         |
| Water rower training per week (h)†                                               | 8.8 ±2.8        | 11.1 ±2.7      | 9.8 ±3.0 (5-16)         |
| Cardiovascular training (i.e., cycling, running, ergometer rowing) per week (h)† | 4.8 ±2.2        | 8.6 ±9.8       | 6.4 ±6.7 (1-33.5)       |
| Age at onset of retirement (yr)                                                  | NA              | 28.6±5.6       | NA                      |
| Years since retirement                                                           | NA              | 3.0 ±1.9       | NA                      |
| OCA (yr)                                                                         | 4.3±3.1         | 2.4±1.4        | 3.9 ±2.7 (1-9)          |
| Years with oligo/amenorrhea                                                      | 4.5 ±3.9        | 4.2 ±4.4       | 4.4±4.0 (0-13)          |
| Menarcheal age (yr)                                                              | 13.4 ±1.1       | 13.0 ±1.2      | 13.2±1.1 (11-15)        |
| Oligo/amenorrhic (N)                                                             | 10              | 7              | 17                      |
| Gynaecological age (yr)                                                          | 13.2±2.2        | 18.5±5.1       | 15.5±4.5 (10-27)*       |
| Total lifetime menses (yr)                                                       | 10.8±2.3        | 14.6±5.4       | 12.4±4.3 (4.9-25.3)     |

1  
2  
3  
4  
5  
6  
7  
8 Values are mean  $\pm$  SD. \* $P < 0.05$  between active and retired rowers:- † at highest  
9 competitive level; gynecological age is years since menarche; OCA is length of oral  
10 contraceptive use in years; all oligo/amenorrhea years were secondary (occurred after  
11 menarche).  
12  
13  
14

### 15 16 17 18 **Bone Mineral Density**

19 Three participants had low BMD at LS (Z-scores -1.5, -1.2 and -1.1), one at FN (Z-score  
20 -1.1) and eight at radius. Three of these had Z-scores below -2 at radius (Z-scores -2.3, -  
21 2.1 and -2.3). As depicted in Figure 1, the mean Z-scores of the oligo/amenorrheic,  
22 active and retired rowers was significantly lower at LS (AD=1.75,  $F(2,21) = 11.455$ ,  $P$   
23  $< 0.01$ ,  $\eta^2 = 0.560$ ) compared to the eumenorrheic rowers. Total lifetime menses  
24 (controlled for BMI values) was positively associated with Z-scores at LS ( $r = 0.516$ ,  
25  $P < 0.05$ ) and at FN ( $r = 0.438$ ,  $P < 0.05$ ).  
26  
27  
28  
29  
30  
31  
32  
33

34 Furthermore, when the retired were looked at separately, the results revealed that the  
35 oligo/amenorrheic rowers had significantly lower Z-scores at LS (AD=2.7,  $F(2,9) =$   
36  $17.307$ ,  $P < 0.01$ ,  $\eta^2 = 0.852$ ) and total body (AD=1.47,  $F(2,9) = 26.756$ ,  $P < 0.01$ ,  
37  $\eta^2 = 0.899$ ) compared to the eumenorrheic retired rowers. Mean Z-scores of  
38 eumenorrheic retired were above normal at all sites.  
39  
40  
41  
42  
43  
44

### 45 46 **Disordered Eating, Pathogenic Weight Control Strategies**

47 All active rowers reported engagement in intentional weight loss to qualify for  
48 lightweight racing. Both active and retired rowers reported DE attitudes (EAT-26 score  
49  $> 20$ ) and pathogenic weight control strategies (Table 2).  
50  
51  
52  
53  
54  
55

Independent sample T-tests showed that active rowers with DE symptoms, had started rowing at a significantly younger age ( $10.6 \pm 3.1$ yr) than those without DE ( $18.3 \pm 4.9$ yr), ( $t=-3.088$ ,  $P<0.05$ ). The EAT-26 score was associated with the amount of intentional weight loss ( $r=0.720$ ,  $P<0.05$ ), see Figure 2, and duration of OCA use ( $r=0.908$ ,  $P<0.001$ ).

Table 2. Reported eating attitudes in lightweight rowers

|                                                | Active<br>N =12             | Retired<br>N=9              | Overall<br>N=21            |
|------------------------------------------------|-----------------------------|-----------------------------|----------------------------|
| DE symptoms N (%)                              | 5 42                        | 1 11                        | 6 29                       |
| Binge eating episodes N (%)                    | 8 67*                       | 0* <del>≠</del>             | 8 38                       |
| Induced vomiting N (%)                         | 3 25*                       | 0* <del>≠</del>             | 3 14                       |
| Use of laxatives N (%)                         | 4 33*                       | 0*<br>2 22 <del>≠</del>     | 6 29                       |
| Intentional weight loss N<br>(%)(Mean loss SD) | 12 100<br>(5.8 $\pm$ 1.9kg) | 8 89<br>(6.3 $\pm$ 4.5kg) † | 20 95<br>(6.0 $\pm$ 3.2kg) |

\*within the last 6 months; †past reported symptoms-laxative-use during their rowing career; †past intentional weight loss to qualify for racing lightweight during their rowing career

### Rib Pain

Seven participants (32%) reported a history of rib pain lasting between 2 to 10 weeks.

As depicted in Figure 3, the Z-scores at total body and LS were significantly lower ( $P<0.05$ ) in rowers with history of rib pain compared to those without. Additionally, rowers with rib pain reported to train more hours per week, (21 vs. 17h,  $P>0.05$ ), and to have higher oligo/amenorrhea years (8.8 vs. 4yr,  $P>0.05$ ) than those without.

1  
2  
3  
4  
5  
6  
7  
8 There is no additional data available.  
9  
10

## 11 **Discussion**

12 This study confirms the co-existence of reduced BMD, oligo/amenorrhea, disordered  
13 eating and intentional weight loss, in UK elite female lightweight rowers. The  
14 association between total lifetime menses and BMD supports the notion that BMD  
15 declines as the number of missed menstrual cycles accumulates [32].  
16  
17

18 A novel, but concerning finding in this study was that total EAT-26 score was  
19 associated with the amount of intentional weight loss in active rowers which suggests  
20 that intentional weight loss increases the likelihood of engaging in DE behaviours.  
21  
22

23 Furthermore, active rowers with DE symptoms, had started rowing at a significantly  
24 younger age ( $10.6 \pm 3.1$ yr) than those without DE ( $18.3 \pm 4.9$ yr), which suggests  
25 involvement in high level training at a young and vulnerable age (all rowers achieved  
26 national and international level) is significantly associated with risk to DE attitudes [37].  
27  
28

29 A meta-analysis of 34 studies (2459 athletes) supports these findings, which showed an  
30 increased risk of DE in elite athletes compared to non-elite [38]. Additionally, a higher  
31 prevalence of eating disorders among adolescent elite athletes than controls has been  
32 reported in a most recent study by Martinsen and Sundgot-Borgen, [39]. Binge eating  
33 was also a common finding among the active rowers (67%), which compares to 52%  
34 encountered by Thiel et al. [40]. Pathogenic weight control strategies and symptoms of  
35 DE and binge eating were more prevalent in the active than the retired rowers of this  
36 study, and in earlier studies on elite rowers [24, 25].  
37  
38  
39  
40  
41  
42  
43  
44  
45  
46  
47  
48  
49  
50  
51  
52  
53  
54  
55  
56  
57  
58  
59  
60

1  
2  
3  
4  
5  
6  
7  
8 Furthermore, only 2/12 (17%) active compared to 4/9 (44%) retired reported to have  
9 received professional nutritional support for rowing and weight management. The  
10 importance of nutritional guidance to help in the prevention and treatment of DE has  
11 been evident to this study and is in agreement with Beals and Manore, [41] who stated  
12 that one of the issues that leads athletes to fail to meet their exercise energy  
13 requirements is lack of appropriate nutritional knowledge. Sundgot-Burgen and  
14 Klungland,[42], reported that the prevalence of DE was reduced from 33% to 15% in  
15 cross-country skiers over an 8-year DE preventative programme. Therefore, quality  
16 nutritional guidance should be offered from a young age to possibly minimize DE and  
17 the health related risks [4, 16, 43]. Youth rowing coach education on DE and Triad risk  
18 or perhaps even weight category rule change consideration may also needed to prevent  
19 DE, the Triad and associated unhealthy conditions in developing lightweight female  
20 rowers.  
21  
22  
23  
24  
25  
26  
27  
28  
29  
30  
31  
32

33  
34 Weight loss is predominantly the result of negative energy balance, however, methods  
35 of intentional weight loss such as the use of laxatives, which was reported in this study,  
36 or other dehydration methods do not necessarily mean low energy availability [44] or a  
37 symptom of DE. In this study no association was found between symptoms of DE and  
38 BMD, which is contrary to previous studies [4, 16]. However, these studies determined  
39 energy deficiency, and assessed DE with the Eating Disorder Inventory instead.  
40  
41 Possibly, DE is not necessarily a component of the Triad whereas low energy  
42 availability is [5]. Assessment of DE is also an important medical consideration, and can  
43 help identify psychopathological individuals with the Triad, in addition to indirectly  
44 establishing the possibility of low energy availability. |  
45  
46  
47  
48  
49  
50  
51  
52  
53  
54  
55  
56  
57  
58  
59  
60

**Comment [MU1]:** The authors need to (in the discussion) discuss the validity of the EAT as a screening instrument for DE in this sample. Specifically also take this into consideration when arguing (p 16, l. 38-40) that “in this study no association was found between symptoms of DE and BMD, which is contrary to previous studies (4, 16). In the referred studies different methods to assess DE and energy deficiency was used. This has to be taken into consideration and will probably effect the author’s statement.

We believe that the highlighted paragraph addresses this comment, and the validity of EAT-26 as a screening instrument is addressed below in pg 17, line 9.



1  
2  
3  
4  
5  
6  
7  
8 Prevalence of DE in lightweight rowers, as assessed by a score  $\geq 20$  on the EAT-26  
9  
10 questionnaire, has been reported to be between 12 and 16% [24, 25] compared to 29% in  
11  
12 this study. These results suggest that the rowers from the above research studies and the  
13  
14 present study are considered “at risk” for clinical eating disorders [45]. This percentage  
15  
16 could have been even higher as athletes tend to under report symptoms of DE [20, 26]  
17  
18 due to denial and secrecy which are hallmarks of DE [22], and because do not consider  
19  
20 eating habits as DE, but as “part of the game” in season. Denying DE symptoms has  
21  
22 clinical implications for these athletes including delayed facilitation of appropriate  
23  
24 therapy. Furthermore, the validity of self-reported questionnaires has been critiqued on  
25  
26 the credibility of honest responses. Therefore, the use of questionnaires alone to assess  
27  
28 symptoms of DE would be best if complimented with a clinical interview in future  
29  
30 studies.

**Comment [MU2]:** This has already been stated in strengths and limitations but you have asked us to mention it in the discussion.

31  
32  
33 In ballet dancers and runners, the reproductive hormonal changes caused by excessive  
34  
35 exercise and low energy availability may result in low BMD at LS [16, 46]. The  
36  
37 mechanical stresses of rowing appear to exert protection on the lumbar BMD [47]. The  
38  
39 eumenorrhic rowers in this study demonstrated elevated BMD measurements compared  
40  
41 to their age and sex-matched reference data, particularly at LS, which is in accord with  
42  
43 Wolman et al. [48]. However, the mean lumbar BMD of the oligo/amenorrhic rowers  
44  
45 in this study was not elevated compared to their age and sex-matched reference data,  
46  
47 suggesting that oligo/amenorrhea has a negative effect on BMD [32]. This can be further  
48  
49 supported by the significantly lower Z-score observed at LS in the rowers with history  
50  
51 of oligo/amenorrhea compared to those without, and the positive association between  
52  
53  
54  
55  
56  
57  
58  
59  
60

1  
2  
3  
4  
5  
6  
7  
8 total lifetime menses and Z-scores at LS and FN found in this study. Previous studies  
9 have shown similar findings [4, 46].  
10  
11

12  
13  
14 In line with the practices of coaches working with rowers in Great Britain [49], the  
15 rowers in this study engaged in strength and power training, predominately consisting of  
16 squats, cleans and lower-body plyometrics. The nature of the sport, and the direction of  
17 force application, dictates that these pulling movements and closed chain exercises are  
18 indeed rational and explains their routine recommendation [50]. Specifically, Ebben [51]  
19 reported that an 8-week strength and power programme using these, improved time,  
20 power and power per stroke during 2000m ergometer rowing. Unsurprisingly, pushing  
21 based strength exercises for the upper-body, such as the bench press, rank quite low on  
22 importance, and upper-body plyometrics generally do not feature [49]. From a training  
23 specificity and performance-based point of view, the reasons for this appear sound.  
24  
25 However, of a bone health perspective, such a focused approach may be contested. The  
26 results of this study and that of others [17, 52] have reported low BMD in the radius of  
27 athletes, suggesting that current training paradigms may not address this appropriately  
28 and perhaps fitness coaches should also address the current and future health of their  
29 athletes. At times, this will require a non-sport specific approach.  
30  
31  
32  
33  
34  
35  
36  
37  
38  
39  
40  
41  
42  
43

44 Furthermore, to support bone health, general health, injury prevention and sporting  
45 performance, current training paradigms should be supported with effective nutritional  
46 guidance and psychological support, when required, to educate, prevent, recognise,  
47 support and manage weight loss and DE in lightweight female rowers [53].  
48  
49  
50  
51  
52  
53  
54  
55

1  
2  
3  
4  
5  
6  
7  
8 Specifically, in this study eight rowers had low BMD at the radius ( $Z < -1$ ) and it has  
9  
10 been recommended that a Z-score of  $< -1.0$  in an athlete warrants further [clinical](#)  
11  
12 investigation [and management](#), even in the absence of prior fracture [5]. The marked  
13  
14 incidence of low BMD at radius might suggest that the stress applied on the upper limb  
15  
16 skeleton through joint-reaction forces, generated during the rowing and/or the strength  
17  
18 and power training undertaken by the rowers in this study were not sufficient to elicit an  
19  
20 increase in BMD or maintain it to normal physiological levels [54]. It might also suggest  
21  
22 that these tensile forces were insufficient to counteract the negative effects of low  
23  
24 energy availability on BMD [3-5, 11] possibly induced by intentional weight loss  
25  
26 methods, a common practice in lightweight rowers as seen here and in previous research  
27  
28 [1, 36]. Furthermore, low radius BMD might reflect the dissipation/diversion of BMD to  
29  
30 weight-bearing sites, at the expense of non-weight bearing sites, such as the radius [52].  
31  
32 These findings reinforce the tenet that bone mineral acquisition obeys a principle of  
33  
34 specificity [52, 55] and that the effects of joint reaction forces on bone formation are not  
35  
36 as effective as those observed through ground reaction forces generated during dynamic  
37  
38 sports and /or activities like running, jumping, kicking, tennis, punching and plyometrics  
39  
40 which can incorporate multidimensional (non-conventional) high peak loading  
41  
42 compressing strains distribution into the bone [54-56].

43  
44 In summary, exercises that directly target the arms such as the bench press and  
45  
46 plyometric push-ups for example, may help in the modelling/remodeling of the bone.

47  
48 This comes into contrast with the sport-specificity theorem and the authors of this study  
49  
50 strongly recommend the implementation of supplemental non-sport specific exercises in  
51  
52 the training programmes of rowers and other athletes, that particularly suffer from low  
53  
54

1  
2  
3  
4  
5  
6  
7  
8 radius BMD, could be a promising means of maximizing bone accrual and health, and  
9 possibly reducing the incidence of skeletal fractures later in life. [This is the first study](#)  
10 [that contrasts with the sport-specificity theorem.](#)  
11  
12  
13

14  
15 Little is known about the long-term effects of DE and oligo/amenorrhea on BMD. In  
16 retired rowers with a history of oligo/amenorrhea, despite resuming normal menses,  
17 their Z-scores at LS and total body were significantly lower than those who had always  
18 been eumenorrheic. This corroborates existing body of knowledge, which suggests that  
19 deficits in BMD may be irreversible [13, 32, 33]. Longitudinal study on a higher number  
20 of female lightweight rowers is required to understand this issue more adequately.  
21  
22  
23  
24  
25  
26  
27

28  
29 An incidence of rib stress fractures in male rowers of up to 12% has been reported [29].  
30 Seven (32%) of participants in this study had history of rib pain lasting 2-8wk (5.1  
31  $\pm$ 2.9wk). Whilst these participants had no radiographic evidence to confirm diagnosis of  
32 rib stress fracture, our study suggests the incidence of rib pain is a common complaint in  
33 female lightweight rowers (2.7 times more common than male rowers) and chronic chest  
34 wall pain in rowers is almost always the result of rib stress fractures as suggested by  
35 Strayer [57]. However, a subsequent study reported that athletes tend to self-report a  
36 higher percentage on stress fractures (14.0%) compared to those diagnosed with stress  
37 fractures (8.1%) ( $P < 0.001$ ), indicating that self-reporting of stress fractures has low  
38 validity [58]. Due to the retrospective nature of this study in terms of assessing rib stress  
39 fractures incidence, it was not possible to make a clinical diagnosis. In this study active  
40 and retired rowers with history of rib pain had significantly lower LS and total body Z-  
41 score values than those without history, which possibly suggests that low BMD may  
42  
43  
44  
45  
46  
47  
48  
49  
50  
51  
52  
53  
54  
55  
56  
57  
58  
59  
60

1  
2  
3  
4  
5  
6  
7  
8 play a role in the aetiology of exercise-induced rib stress fractures in female lightweight  
9 rowers. Interestingly, Nevill et al. [52] reported significant correlations ( $P < 0.05$ )  
10 between BMD recorded at ribs, thoracic and lumbar spine, pelvis, legs, hip and arms.  
11 This study's results are in agreement with others [19, 29, 30], although the association  
12 between low BMD and fractures has been established in postmenopausal women with  
13 osteoporosis [59] and not in premenopausal.

14 Generalisations for elite female lightweight rowers are limited by the small sample size,  
15 however, lightweight rowing is a "minority" sport reflected by the relatively small  
16 number (79) of female lightweight rowers identified to participate in National level  
17 competition during the study year. Therefore, further research that recruits a larger  
18 sample of lightweights and is required to verify the findings from this study. a control  
19 group of either non-athletes, athletes from other sports, or non-lightweight rowers is  
20 recommended to further substantiate the findings of this study. However, future research  
21 should focus on measuring energy input versus energy output and assess in more detail,  
22 calcium, anti-inflammatory medications, vitamin A and D supplemental intake and the  
23 methods and behaviours associated with IWL. The establishment of normal BMD  
24 reference ranges in athletes is needed since the application of a reference range based on  
25 the general non-athletic population may not be appropriate [17]. Finally, the effect of  
26 upper body resistance and plyometrics training on BMD should be investigated to  
27 determine if this could counter the negative effects of DE and oligo/amenorrhea.  
28  
29  
30  
31  
32  
33  
34  
35  
36  
37  
38  
39  
40  
41  
42  
43  
44  
45  
46  
47

48 This study suggests that lightweight rowing rules may be partly responsible for resultant  
49 high levels of DE, high rates of oligo/amenorrhea, BMD deficiencies which are  
50 correlated with number of lifetime menses, and the tendency to have DE after  
51  
52  
53  
54  
55  
56  
57  
58  
59  
60

1  
2  
3  
4  
5  
6  
7  
8 retirement. Apparent DE vulnerability of lightweight female rowers commencing  
9 training at a younger age is of great concern. Lightweight female rowing rules mean that  
10 any athlete above the height of 175cm meeting the mean target weight of 57kg would be  
11 underweight with a BMI of <18.5. We would therefore encourage lightweight rowing to  
12 embrace sports injury prevention and provide coaches and athletes with appropriate  
13 multidisciplinary nutritional and psychological support to prevent DE and the  
14 development of the Triad, and perhaps to also consider changing the weight rules to  
15 discourage unhealthy weight loss practices. Previous research suggests that rowing  
16 performance is strongly correlated to body height (related to arm and leg length), as well  
17 as body mass [60, 61, 62, 63]. Our study would therefore support competitive categories  
18 being explored by height, rather than weight to help avoid detrimental health and  
19 performance issues identified in our study related to DE and the Triad.

20  
21  
22  
23  
24  
25  
26  
27  
28  
29  
30  
31  
32  
33 **Contributorship statement:**

34 LD, AR and RL-S conceived the idea for the study and prepared the methods. LD  
35 completed the scanning and analysed it. LD, AR and RL-S collected the data and  
36 analysed it. LD, AR and RL-S drafted the initial paper and RW, AT, LH and NJ  
37 contributed with further critical drafting. All authors critically revised and approved the  
38 final version of the manuscript.

39  
40  
41  
42  
43  
44  
45 **Funding:** No funding.

46  
47  
48  
49 **What are the new findings**

- This study confirms the co-existence of reduced BMD, oligo/amenorrhea, disordered eating and intentional weight loss, in UK elite female lightweight rowers.
- EAT-26 scores were associated with the amount of intentional weight loss, which suggests that intentional weight loss increases the likelihood of engaging in DE behaviours in active rowers.
- Active rowers with DE symptoms, had started rowing at a significantly younger age ( $10.6 \pm 3.1$ yr) than those without DE ( $18.3 \pm 4.9$ yr), which suggests involvement in high level training at a young and vulnerable age (all rowers achieved national and international level) is significantly associated with risk to DE attitudes.
- Only 2/12 (17%) active compared to 4/9 (44%) retired reported to have received professional nutritional support for rowing and weight management.

#### **How might it impact on clinical practice in the near future**

- Individuals considering rowing in a lightweight category may benefit from assessment and monitoring for physical and psychological health risk and their suitability and sport participation safety by a trained sports medicine physician/scientist.
- If considered that they can safely achieve the required weight loss then they should be supported with nutritional guidance and regular monitoring of energy availability, DE and assessment of menstrual function.
- Athletes and coaches should be educated about the risks of DE, low energy

1  
2  
3  
4  
5  
6  
7  
8 availability and menstrual dysfunction on systemic health to help in the  
9 prevention and treatment of the Triad in lightweight rowers.

- 10  
11  
12 • Nutritional guidance and psychological support should be offered at a young age  
13 to minimize DE and health related risks, and supplemental strength and  
14 conditioning training that involves non-sport specific exercises that distribute  
15 multidimensional high peak strains on the upper body skeleton is likely to elicit  
16 bone health and performance benefits for female lightweight rowers.  
17  
18  
19  
20  
21

## 22 23 24 25 26 **References**

27 1 Rumball JS, Lebrun CM, De Ciacca SR, et al. Rowing Injuries. *Sports Med*  
28 2005;**35**:537-55.

29  
30  
31  
32 2 Slater GJ, Rice AJ, Jujika I, et al. Physique traits of lightweight rowers and their  
33 relationship to competitive success. *Brit J Sports Med* 2005;**39**:736-41.

34  
35  
36  
37 3 Talbott SM, Shapses SA. Fasting and energy intake influence bone turnover in  
38 lightweight male rowers. *Int J Sport Nut* 1998;**8**:377-87.

39  
40  
41  
42 4 Zanker CL, Swaine IL. Relation between bone turnover, oestradiol, and energy  
43 balance in women distance runners. *Brit J Sports Med* 1998;**32**:167-71.

44  
45  
46  
47 5 Nattiv A, Loucks AB, Manore MM, et al. American College of Sports Medicine  
48 position stand: The female athlete triad. *Med Sci Sports Exerc* 2007;**39**:1867-82.  
49  
50  
51  
52  
53  
54  
55



1  
2  
3  
4  
5  
6  
7  
8  
9  
10 6 Burr DB, Milgrom C. *Musculoskeletal Fatigue and Stress Fractures*. Boca Raton:  
11 CRC Press 2001.

12  
13  
14  
15  
16 7 Hoch AZ, Papanek P, Szabo A, et al. Association between the female athlete triad and  
17 endothelial dysfunction in dancers. *Clin J Sport Med* 2011;**21**:119-25.

18  
19  
20  
21 8 Flier JS. Clinical review 94: What's in a name? In search of leptin's physiologic role.  
22 *J Clin Endocrinol Metab* 1998;**83**:1407-13.

23  
24  
25  
26  
27 9 Zanker CL, Swaine IL. Responses of bone turnover markers to repeated endurance  
28 running in humans under conditions of energy balance or energy restriction. *Eur J Appl*  
29 *Physiol* 2000;**83**:434-40.

30  
31  
32  
33  
34 10 Eriksen EF, Colvard DS, Berg NJ, et al. Evidence of oestrogen receptors in normal  
35 human osteoblasts. *Science* 1988;**241**:84-6.

36  
37  
38  
39  
40 11 Ihle R, Louks AB. Dose–response relationships between energy availability and bone  
41 turnover in young exercising women. *J Bone Miner Res* 2004;**19**:1231-40.

42  
43  
44  
45  
46 12 Joy EA, Campbell D. Stress fractures in the female athlete. *Curr Sports Med Rep*  
47 2005;**4**:323-8.

1  
2  
3  
4  
5  
6  
7  
8 13 Warren MP, Brooks-Gunn J, Fox RP, et al. Osteopenia in exercise-associated  
9 amenorrhea using ballet dancers as a model: A longitudinal study. *J Clin Endocrinol*  
10 *Metab* 2002;**87**:3162-8.  
11  
12

13  
14  
15 14 Hoch AZ, Papanek P, Havlik HS, et al. Prevalence of the female athlete triad/tetrad  
16 in professional ballet dancers. *Med Sci Sports Exerc* 2009;**41**:524.  
17  
18

19  
20  
21 15 Hoch Z, Stavrakos EJ, Schimke FJ. Prevalence of female athlete triad characteristics  
22 in a club triathlon team. *Arch Phys Med Rehabil* 2007;**88**:681-2.  
23  
24

25  
26  
27 16 Cobb KL, Bachrach LK, Greendale G, et al. Disordered eating, menstrual irregularity  
28 and bone mineral density in female runners. *Med Sci Sports Exerc* 2003;**35**:711-9.  
29  
30

31  
32  
33 17 Pollock P, Grogan C, Perry M, et al. Bone-mineral density and other features of the  
34 female athlete triad in elite endurance runners: A longitudinal and cross-sectional  
35 observational study. *Int J Sport Nut Exerc Metab* 2010;**20**:418-26.  
36  
37

38  
39  
40 18 Schtscherbyna A, Soares EA, de Oliveira FP, et al. Female athlete triad in elite  
41 swimmers of the city of Rio de Janeiro, Brazil. *Nutrition* 2009;**25**:634-9.  
42  
43

44  
45  
46 19 Warden SJ, Gutschlag FR, Wajswelner H, et al. Aetiology of rib stress fractures in  
47 rowers. *Sports Med* 2002;**32**:819-36.  
48  
49

1  
2  
3  
4  
5  
6  
7  
8  
9  
10  
11  
12  
13  
14  
15  
16  
17  
18  
19  
20  
21  
22  
23  
24  
25  
26  
27  
28  
29  
30  
31  
32  
33  
34  
35  
36  
37  
38  
39  
40  
41  
42  
43  
44  
45  
46  
47  
48  
49  
50  
51  
52  
53  
54  
55  
56  
57  
58  
59  
60

20 Nattiv A, Agostini R, Drinkwater B, et al. The female athlete triad: The inter-relatedness of disordered eating, amenorrhea, and osteoporosis. *Clin Sports Med* 1994;**13**:405-18.

21 Sundgot-Borgen J, Torstveit MK. Prevalence of eating disorders in elite athletes is higher than in the general population. *Clin J Sport Med* 2004;**14**:25-32.

22 Currie A, Morse ED. Eating disorders in athletes: managing the risks. *Clin Sports Med* 2005;**24**:871-83.

23 Byrne S, McClean N. Elite athletes: effects of the pressure to be thin. *J Sci Med Sport* 2002;**5**:80-94.

24 Terry PC, Lane AM, Warren L. Eating attitudes, body shape perceptions and mood of elite rowers. *J Sci Med Sport* 1999;**2**:67-77.

25 Terry PC, Waite J. Eating attitudes and body shape perceptions among elite rowers: effects of age, gender and weight category. *Aust J Sci Med Sport* 1996;**28**:3-6.

26 Sundgot-Borgen J. Prevalence of eating disorders in elite female athletes. *Int J Sport Nutr* 1993;**3**:29-40.

1  
2  
3  
4  
5  
6  
7  
8 27 Rauh MJ, Nichols JF, Barrack MT. Relationships among injury and disordered  
9 eating, menstrual dysfunction, and low bone mineral density in high school athletes: a  
10 prospective study. *J Athl Train* 2010;**45**:243-52.  
11  
12

13  
14  
15 28 Beck TJ, Ruff CB, Shaffer RA, et al. Stress fracture in military recruits: gender  
16 differences in muscle and bone susceptibility factors. *Bone* 2000;**27**:437-44.  
17  
18

19  
20  
21 29 Vinther A, Kanstrup IL, Christiansen E, et al. Exercise-induced rib stress fractures:  
22 influence of reduced bone mineral density. *Scand J Med Sci Sports* 2005;**15**:95-9.  
23  
24

25  
26  
27 30 Hickey GJ, Fricker PA, McDonald WA. Injuries to elite rowers over a 10-year  
28 period. *Med Sci Sports Exerc* 1997;**29**:1567-72.  
29  
30

31  
32  
33 31 Budget R, Hettinga DM, Steinacker J. Sports Medicine. In: Secher NH, Volianitis S.  
34 eds. *Rowing*. London: Blackwell 2007:124-140.  
35  
36

37  
38  
39 32 Keen AD, Drinkwater BL. Irreversible bone loss in former amenorrheic athletes.  
40 *Osteoporosis Int* 1997;**7**:311-5.  
41  
42

43  
44  
45 33 Barrack MT, Van Loan MD, Rauh MJ, et al. Body mass, training, menses, and bone  
46 in adolescent runners: a 3-yr follow-up. *Med Sci Sports Exerc* 2011;**43**:959-66.  
47  
48

49  
50  
51 34 Garner DM, Olmsted MP, Bohr Y, et al. The eating attitudes test: psychometric  
52 features and clinical correlates. *Psychol Med* 1982;**12**:871-8.  
53  
54

1  
2  
3  
4  
5  
6  
7  
8  
9  
10 35 American Psychiatric Association, eds. *Diagnostic and statistical manual of mental*  
11 *disorders: DSM-IV-TR*®. Washington DC: American Psychiatric Association 2000.

12  
13  
14  
15  
16 36 Karlson KA, Becker CB, Merkur A. Prevalence of eating disordered behaviour in  
17 collegiate lightweight women rowers and distance runners. *Clin J Sports Med*  
18 2001;**11**:32-7.

19  
20  
21  
22  
23 37 Sundgot-Borgen J. Risk and trigger factors for the development of eating disorders in  
24 female elite athletes. *Med Sci Sports Exerc* 1994;**26**:414-9.

25  
26  
27  
28  
29 38 Smolak L, Murnen SK, Ruble AE. Female athletes and eating problems: a meta-  
30 analysis. *Int J Eating Disord* 2000;**27**:371-80.

31  
32  
33  
34  
35 39 Martinsen M, Sundgot-Borgen J. Higher prevalence of eating disorders among  
36 adolescent elite athletes than controls. *Med Sci Sports Exerc* 2013;**45**:1188-97.

37  
38  
39  
40 40 Thiel A, Gottfried H, Hesse FW. Subclinical eating disorders in male athletes: a  
41 study of the low weight category in rowers and wrestlers. *Acta Psychiatr Scand*  
42 1993;**88**:259-65.

43  
44  
45  
46  
47  
48 41 Beals KA, Manore MM. Behavioral, psychological, and physical characteristics of  
49 female athletes with subclinical eating disorders. *Int J Sport Nutr Exerc Metab*  
50 2000;**10**:128-43.

1  
2  
3  
4  
5  
6  
7  
8  
9  
10 42 Sundgot-Borgen J, Klungland M. The female athlete triad and the effect of  
11 preventative work. *Med Sci Sports Exerc* 1998;**30**:S181.

12  
13  
14  
15  
16 43 Emery CA, Hagel B, Morrongiello B. Injury prevention in child and adolescent sport:  
17 whose responsibility is it? *Clin J Sport Med* 2006;**6**:514-21.

18  
19  
20  
21  
22 44 Carney CP, Andersen AE. Eating disorders. Guide to medical evaluation and  
23 complications. *Psychiatr Clin North Am* 1996;**19**:657-79.

24  
25  
26  
27 45 Smock AJ, Hughes JM, Popp KL, et al. Bone volumetric density, geometry and  
28 strength in female and male collegiate runners. *Med Sci Sports Exerc* 2009;**41**:2026-32.

29  
30  
31  
32 46 Drinkwater BL, Nilson K, Chesnut CH 3rd, et al. Bone mineral content of  
33 amenorrheic and eumenorrheic athletes. *N Engl J Med* 1984;**2**:277-81.

34  
35  
36  
37  
38 47 Lariviere JA, Robinson TL, Snow CM. Spine bone mineral density increases in  
39 experienced but not novice collegiate female rowers. *Med Sci Sports Exerc*  
40 2003;**35**:1740-4.

41  
42  
43  
44  
45 48 Wolman RL, Clark P, McNally E, et al. Menstrual state and exercise as determinants  
46 of spinal trabecular bone density in female athletes. *Brit Med Journal* 1990;**301**:516-8.

1  
2  
3  
4  
5  
6  
7  
8 49 Gee TI, Olsen PD, Berger NJ, et al. Strength and conditioning practices in rowing. *J*  
9 *Strength Cond Res* 2011;**25**:668-82.

10  
11  
12  
13  
14 50 Ivey P, Oakley J, Hagerman P. Strength training for the preparatory phase in  
15 collegiate women's rowing. *Strength & Cond Journal* 2004;**26**:10-5.

16  
17  
18  
19  
20 51 Ebben WP, Kindler AG, Chirdon KA, et al. The effect of high-load vs. high-  
21 repetition training on endurance performance. *J Strength Cond Res* 2004;**18**:513-7.

22  
23  
24  
25 52 Nevill AM, Burrows M, Holder RL, et al. Does lower-body BMD develop at the  
26 expense of upper-body BMD in female runners? *Med Sci Sports Exerc* 2003;**35**:1733-9.

27  
28  
29  
30  
31 53 [Manore MM. Dietary recommendations and athletic menstrual dysfunction.](#)  
32 [Sports Med 2002; 32:887-901.](#)

33  
34  
35 54 Kohrt WM, Ehsani AA, Birge SJ Jr. Effects of exercise involving predominantly  
36 either joint-reaction or ground-reaction forces on bone mineral density in older women.  
37  
38 *J Bone Miner Res* 1997;**12**:1253-61.

39  
40  
41  
42 55 Sanchis-Moysi J, Dorado C, Olmedillas H, et al. Bone and lean mass inter-arm  
43 asymmetries in young male tennis players depend on training frequency. *Eur J Appl*  
44 *Physiol* 2010;**110**:83-90.

45  
46  
47  
48  
49 56 Platen P, Chae EH, Antz R, et al. Bone mineral density in top level male athletes of  
50 different sports. *Eur J Sport Sci* 2001;**1**:1-15.

1  
2  
3  
4  
5  
6  
7  
8  
9  
10 57 Strayer LM. The myth of the intercostal muscle pull. *Am Rowing* 1990;**22**:42-4.  
11

12  
13  
14 58 Øyen J, Torstveit MK, Sundgot-Borgen J. Self-reported versus diagnosed stress  
15 fractures in Norwegian female elite athletes. *J Sports Sci Med* 2009;**8**:130-5.  
16  
17

18  
19 59 Melton LJ 3rd, Atkinson EJ, O'Fallon WM et al. Long-term fracture prediction by  
20 bone mineral assessed at different skeletal sites. *J Bone Miner Res* 1993;**8**:1227-33.  
21  
22

23  
24  
25 [60 Yoshiga CC, Higuchi M. Rowing performance of female and male rowers. \*Scand J\*](#)  
26 [Med Sci Sports](#) 2003;**13**:317-321.

27  
28 [61 Barrett RS, Manning JM. Rowing: Relationships between rigging set-up,](#)  
29 [anthropometry, physical capacity, rowing kinematics and rowing performance. \*Sports\*](#)  
30 [Biomec](#) 2004;**3**:221-235.

31  
32 [62 Huang, Chun-Jung, Thomas W, Nesser TW, et al. Strength and power determinants](#)  
33 [of rowing performance. \*J Exerc Physiol Online\* 2007;\*\*10\*\*:43-50.](#)

34  
35  
36 [63 Pavle M, Ružić L. Predicting the 1000m rowing ergometer performance in 12-13-](#)  
37 [year-old rowers: The basis for selection process?." \*J Sci and Med in Sport\*](#)  
38 [2008;\*\*11\*\*:218-226.](#)  
39  
40  
41  
42  
43  
44  
45  
46  
47  
48  
49  
50  
51  
52  
53  
54  
55  
56  
57  
58  
59  
60



Figure 1. BMD Z-scores (Mean  $\pm$ SD) at total body (TB), lumbar spine (LS), radius and neck of femur (NF) in rowers with and without a history of oligo/amenorrhea.

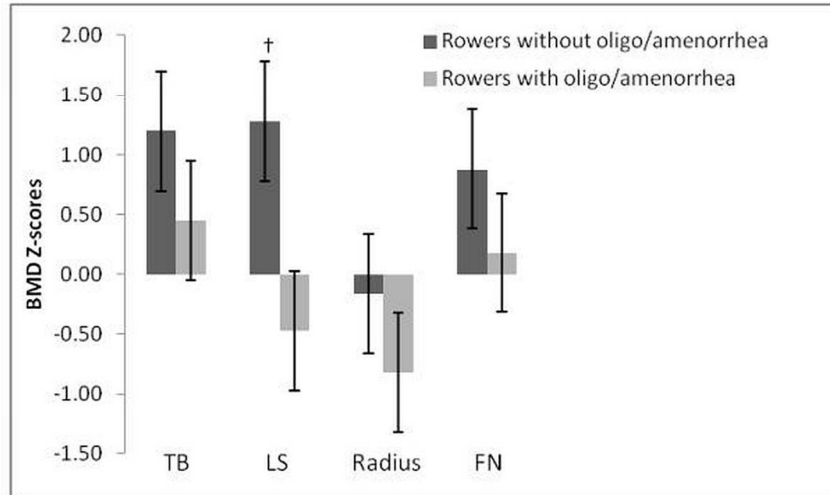

†Significant difference ( $p < 0.001$ ) between rowers with and without a history of oligo/amenorrhea.

BMD Z-scores (Mean  $\pm$ SD) at total body (TB), lumbar spine (LS), radius and neck of femur (NF) in rowers with and without a history of oligo/amenorrhea.  
119x90mm (300 x 300 DPI)

Figure 2. Relationship between the amount of intentional weight loss and EAT-26 score, a measure of DE, in active rowers, ( $r=0.720$ ,  $p<0.05$ ).

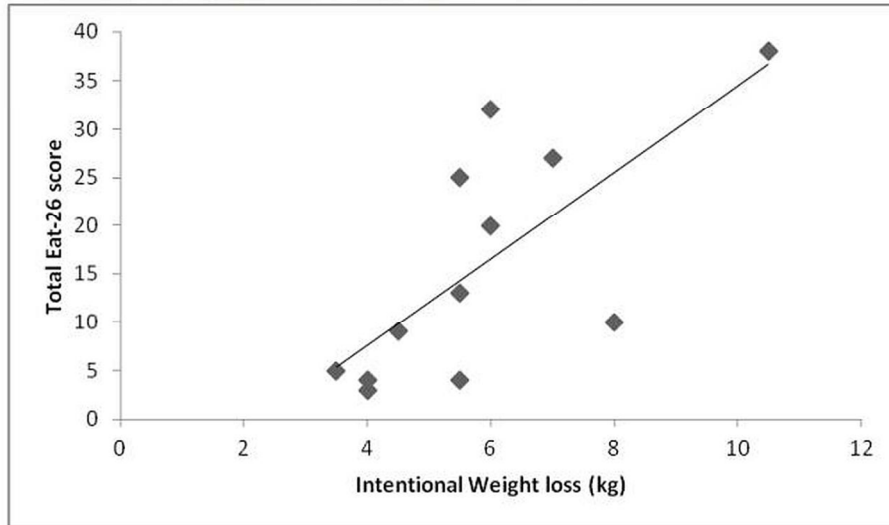

119x90mm (300 x 300 DPI)

1  
2  
3  
4  
5  
6  
7  
8  
9  
10  
11  
12  
13  
14  
15  
16  
17  
18  
19  
20  
21  
22  
23  
24  
25  
26  
27  
28  
29  
30  
31  
32  
33  
34  
35  
36  
37  
38  
39  
40  
41  
42  
43  
44  
45  
46  
47  
48  
49  
50  
51  
52  
53  
54  
55  
56  
57  
58  
59  
60

Figure 3. BMD Z-scores (Mean ±SD) at total body (TB), lumbar spine (LS), radius and neck of femur (NF) in rowers with and without a history of rib pain.

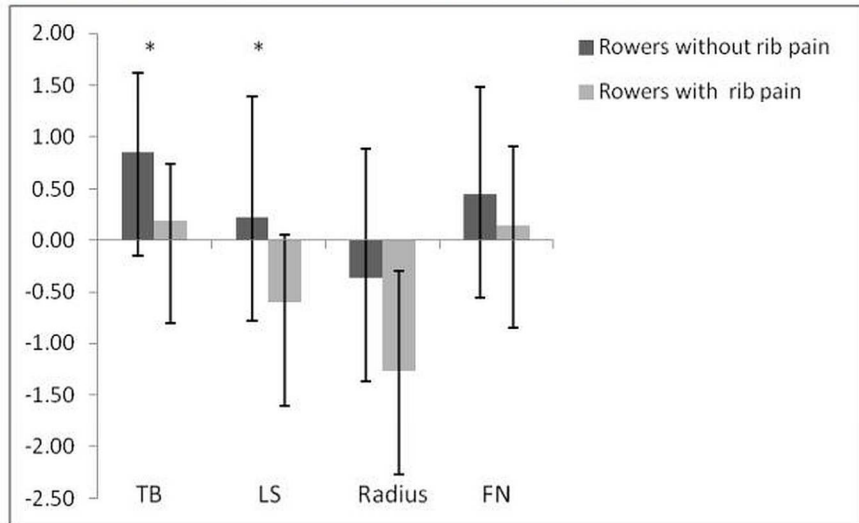

\*Significant difference (P<0.05) between rowers with and without a history of rib pain.

\*Significant difference (P<0.05) between rowers with and without a history of rib pain.  
119x90mm (300 x 300 DPI)

View only

**STROBE 2007 (v4) checklist of items to be included in reports of observational studies in epidemiology\***  
**Checklist for cohort, case-control, and cross-sectional studies (combined)**

| Section/Topic             | Item # | Recommendation                                                                                                                                                                                                                                                                                                                                                                                                                                                         | Reported on page # |
|---------------------------|--------|------------------------------------------------------------------------------------------------------------------------------------------------------------------------------------------------------------------------------------------------------------------------------------------------------------------------------------------------------------------------------------------------------------------------------------------------------------------------|--------------------|
| Title and abstract        | 1      | (a) Indicate the study's design with a commonly used term in the title or the abstract                                                                                                                                                                                                                                                                                                                                                                                 | 1                  |
|                           |        | (b) Provide in the abstract an informative and balanced summary of what was done and what was found                                                                                                                                                                                                                                                                                                                                                                    | 2                  |
| <b>Introduction</b>       |        |                                                                                                                                                                                                                                                                                                                                                                                                                                                                        |                    |
| Background/rationale      | 2      | Explain the scientific background and rationale for the investigation being reported                                                                                                                                                                                                                                                                                                                                                                                   | 3-5                |
| Objectives                | 3      | State specific objectives, including any pre-specified hypotheses                                                                                                                                                                                                                                                                                                                                                                                                      | 5                  |
| <b>Methods</b>            |        |                                                                                                                                                                                                                                                                                                                                                                                                                                                                        |                    |
| Study design              | 4      | Present key elements of study design early in the paper                                                                                                                                                                                                                                                                                                                                                                                                                | 5-9                |
| Setting                   | 5      | Describe the setting, locations, and relevant dates, including periods of recruitment, exposure, follow-up, and data collection                                                                                                                                                                                                                                                                                                                                        | 5                  |
| Participants              | 6      | (a) <i>Cohort study</i> —Give the eligibility criteria, and the sources and methods of selection of participants. Describe methods of follow-up<br><i>Case-control study</i> —Give the eligibility criteria, and the sources and methods of case ascertainment and control selection. Give the rationale for the choice of cases and controls<br><i>Cross-sectional study</i> —Give the eligibility criteria, and the sources and methods of selection of participants | 6                  |
|                           |        | (b) <i>Cohort study</i> —For matched studies, give matching criteria and number of exposed and unexposed<br><i>Case-control study</i> —For matched studies, give matching criteria and the number of controls per case                                                                                                                                                                                                                                                 |                    |
| Variables                 | 7      | Clearly define all outcomes, exposures, predictors, potential confounders, and effect modifiers. Give diagnostic criteria, if applicable                                                                                                                                                                                                                                                                                                                               | 7-10               |
| Data sources/ measurement | 8*     | For each variable of interest, give sources of data and details of methods of assessment (measurement). Describe comparability of assessment methods if there is more than one group                                                                                                                                                                                                                                                                                   |                    |
| Bias                      | 9      | Describe any efforts to address potential sources of bias                                                                                                                                                                                                                                                                                                                                                                                                              | 6,7                |
| Study size                | 10     | Explain how the study size was arrived at                                                                                                                                                                                                                                                                                                                                                                                                                              | 5,6                |
| Quantitative variables    | 11     | Explain how quantitative variables were handled in the analyses. If applicable, describe which groupings were chosen and why                                                                                                                                                                                                                                                                                                                                           | 10                 |
| Statistical methods       | 12     | (a) Describe all statistical methods, including those used to control for confounding                                                                                                                                                                                                                                                                                                                                                                                  | 10                 |
|                           |        | (b) Describe any methods used to examine subgroups and interactions                                                                                                                                                                                                                                                                                                                                                                                                    | NA                 |
|                           |        | (c) Explain how missing data were addressed                                                                                                                                                                                                                                                                                                                                                                                                                            | 5-10               |

|                          |     |                                                                                                                                                                                                                                                                                                                                                                                                               |                           |
|--------------------------|-----|---------------------------------------------------------------------------------------------------------------------------------------------------------------------------------------------------------------------------------------------------------------------------------------------------------------------------------------------------------------------------------------------------------------|---------------------------|
|                          |     | (d) <i>Cohort study</i> —If applicable, explain how loss to follow-up was addressed<br><i>Case-control study</i> —If applicable, explain how matching of cases and controls was addressed<br><i>Cross-sectional study</i> —If applicable, describe analytical methods taking account of sampling strategy                                                                                                     |                           |
|                          |     | (e) Describe any sensitivity analyses                                                                                                                                                                                                                                                                                                                                                                         |                           |
| <b>Results</b>           |     |                                                                                                                                                                                                                                                                                                                                                                                                               |                           |
| Participants             | 13* | (a) Report numbers of individuals at each stage of study—eg numbers potentially eligible, examined for eligibility, confirmed eligible, included in the study, completing follow-up, and analysed<br>(b) Give reasons for non-participation at each stage<br>(c) Consider use of a flow diagram                                                                                                               | 5,6                       |
| Descriptive data         | 14* | (a) Give characteristics of study participants (eg demographic, clinical, social) and information on exposures and potential confounders<br>(b) Indicate number of participants with missing data for each variable of interest<br>(c) <i>Cohort study</i> —Summarise follow-up time (eg, average and total amount)                                                                                           | 11                        |
| Outcome data             | 15* | <i>Cohort study</i> —Report numbers of outcome events or summary measures over time<br><i>Case-control study</i> —Report numbers in each exposure category, or summary measures of exposure<br><i>Cross-sectional study</i> —Report numbers of outcome events or summary measures                                                                                                                             |                           |
| Main results             | 16  | (a) Give unadjusted estimates and, if applicable, confounder-adjusted estimates and their precision (eg, 95% confidence interval). Make clear which confounders were adjusted for and why they were included<br>(b) Report category boundaries when continuous variables were categorized<br>(c) If relevant, consider translating estimates of relative risk into absolute risk for a meaningful time period | 10-13                     |
| Other analyses           | 17  | Report other analyses done—eg analyses of subgroups and interactions, and sensitivity analyses                                                                                                                                                                                                                                                                                                                | 10-13                     |
| <b>Discussion</b>        |     |                                                                                                                                                                                                                                                                                                                                                                                                               |                           |
| Key results              | 18  | Summarise key results with reference to study objectives                                                                                                                                                                                                                                                                                                                                                      | Figures and tables, 10-13 |
| Limitations              | 19  | Discuss limitations of the study, taking into account sources of potential bias or imprecision. Discuss both direction and magnitude of any potential bias                                                                                                                                                                                                                                                    | 18-20                     |
| Interpretation           | 20  | Give a cautious overall interpretation of results considering objectives, limitations, multiplicity of analyses, results from similar studies, and other relevant evidence                                                                                                                                                                                                                                    | 14-18                     |
| Generalisability         | 21  | Discuss the generalisability (external validity) of the study results                                                                                                                                                                                                                                                                                                                                         | 19,20                     |
| <b>Other information</b> |     |                                                                                                                                                                                                                                                                                                                                                                                                               |                           |
| Funding                  | 22  | Give the source of funding and the role of the funders for the present study and, if applicable, for the original study on which the present article is based                                                                                                                                                                                                                                                 | No funding.20.            |

\*Give information separately for cases and controls in case-control studies and, if applicable, for exposed and unexposed groups in cohort and cross-sectional studies.

1  
2  
3  
4 **Note:** An Explanation and Elaboration article discusses each checklist item and gives methodological background and published examples of transparent reporting. The STROBE  
5 checklist is best used in conjunction with this article (freely available on the Web sites of PLoS Medicine at <http://www.plosmedicine.org/>, Annals of Internal Medicine at  
6 <http://www.annals.org/>, and Epidemiology at <http://www.epidem.com/>). Information on the STROBE Initiative is available at [www.strobe-statement.org](http://www.strobe-statement.org).  
7  
8  
9  
10  
11  
12  
13  
14  
15  
16  
17  
18  
19  
20  
21  
22  
23  
24  
25  
26  
27  
28  
29  
30  
31  
32  
33  
34  
35  
36  
37  
38  
39  
40  
41  
42  
43  
44  
45  
46  
47  
48  
49

For peer review only
